# Supplementary material for: Cα–Cβand Cα–N bond cleavage in the dissociation of protonated N–benzyllactams: dissociative proton transfer and intramolecular proton-transport catalysis
Source: Royal Society of Chemistry journal article supplement (doi:10.1039/c1ob06020a), 2011-10-17
Supplement: c1ob06020a.pdf [file c1ob06020a.pdf]

## Electronic Supplementary Information

# $C^{\alpha}$ - $C^{\beta}$ and $C^{\alpha}$ -N Bonds Cleavage in the Dissociation of Protonated *N*-benzylactams: Dissociative Proton Transfer and Intramolecular Proton-Transport Catalysis

Yunfeng Chai, Cheng Guo, Kezhi Jiang, Yuanjiang Pan\*, Cuirong Sun\*

Department of Chemistry, Zhejiang University, Hangzhou, Zhejiang 310027, China

panyuanjiang@zju.edu.cn; suncuirong@zju.edu.cn

### Contents

- **Scheme S1.** DFT optimized structure of protonated *N*-benzylbutyrolactam. Chemical bonds are given in Å.
- **Table S1.** Computed relative energies of protonated *N*-(4-methoxybenzyl)butyrolactam and protonated *N*-(4-nitrobenzyl)butyrolactam with different protonation sites.
- **Table S2.** The relative energies for 1,2-H shift along the phenyl ring. The calculations were carried out at the B3LYP/6-31++G(d,p) level of theory.
- **Figure S1-S17.** CID mass spectra of the  $[M + H]^+$  or  $[M + D]^+$  ions of compounds studied.
- **Figure S18.** The relative energies of proton transfers in the fragmentation of protonated *N*-(3-hydroxybenzyl)butyrolactam using DFT calculations at the B3LYP/6-31++G(d,p) level. Relative energies are given in  $\text{kJ mol}^{-1}$ .
- NMR spectra of Compound **5** and Compound **5-d<sub>7</sub>** ( $\text{CDCl}_3$  as solvent).
- Figures, cartesian coordinates, total energies, zero point energy corrections and the number of imaginary frequencies of all optimized structures discussed in the text at the B3LYP/6-31++G(d,p) level.

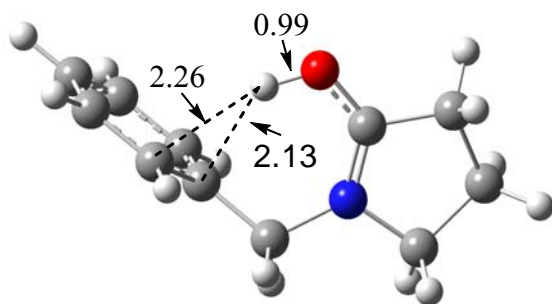

**Scheme S1.** DFT optimized structure of protonated *N*-benzylbutyrolactam. Chemical bonds are given in Å.

**Table S1.** Computed relative energies of protonated *N*-(4-methoxybenzyl)butyrolactam and protonated *N*-(4-nitrobenzyl)butyrolactam with different protonation sites. <sup>a</sup>

| Compound                                                                            | Protonation site | Energy (a.u.) <sup>b</sup> |
|-------------------------------------------------------------------------------------|------------------|----------------------------|
| 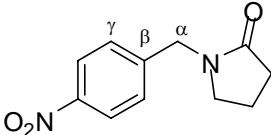 | Carbonyl O       | -761.597936                |
|                                                                                     | Amide N          | -761.580348                |
|                                                                                     | C <sup>β</sup>   | -761.593833                |
|                                                                                     | C <sup>γ</sup>   | -761.563427                |
|                                                                                     | Substituent      | -761.584219                |
|  | Carbonyl O       | -671.608429                |
|                                                                                     | Amide N          | -671.588562                |
|                                                                                     | C <sup>β</sup>   | -671.584537                |
|                                                                                     | C <sup>γ</sup>   | -671.563930                |
|                                                                                     | Substituent      | -671.551463                |

<sup>a</sup> B3LYP/6-31G(d).

<sup>b</sup> Sum of electronic and thermal Energy.

**Table S2.** The relative energies for 1,2-H shift along the phenyl ring. The calculations were carried out at the B3LYP/6-31++G(d,p) level of theory.

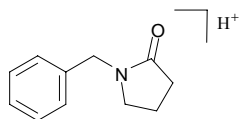

| Proton transfer between atoms <sup>a</sup> | Energy (Hartree) <sup>b</sup> | Relative energy (kJ mol <sup>-1</sup> ) <sup>c</sup> |
|--------------------------------------------|-------------------------------|------------------------------------------------------|
| C <sub>ipso</sub> ↔ C <sub>ortho</sub>     | -557.087783                   | 68.4                                                 |
|                                            | -557.085442                   | 74.6                                                 |
| C <sub>ortho</sub> ↔ C <sub>meta</sub>     | -557.089005                   | 65.2                                                 |
|                                            | -557.084469                   | 77.1                                                 |
| C <sub>meta</sub> ↔ C <sub>para</sub>      | -557.088685                   | 66.0                                                 |
|                                            | -557.085670                   | 74.0                                                 |

<sup>a</sup> Two kinds of configurations were considered.

<sup>b</sup> Sum of electronic and thermal Energy.

<sup>c</sup> The relative energy of MH-2 (-557.113839 Hartree) is zero.

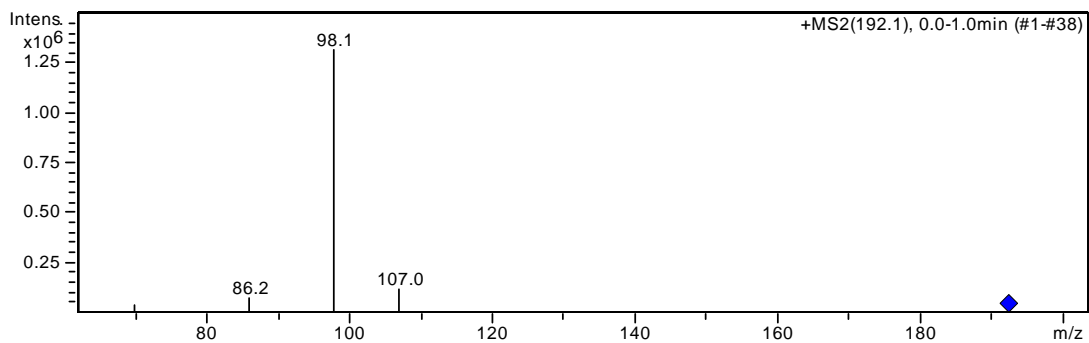

**Figure S1.** CID mass spectrum of the  $[M + H]^+$  ion of Compound **1** ( $R=p\text{-OH}$ ).

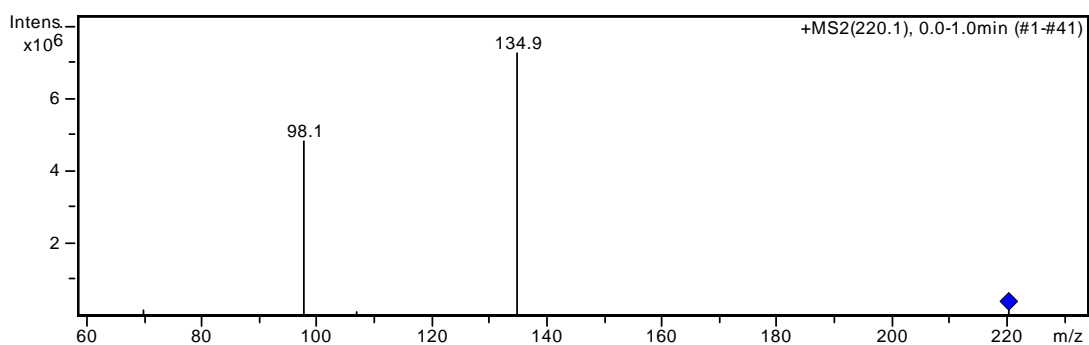

**Figure S2.** CID mass spectrum of the  $[M + H]^+$  ion of Compound **2** ( $R=p\text{-OC}_2\text{H}_5$ ).

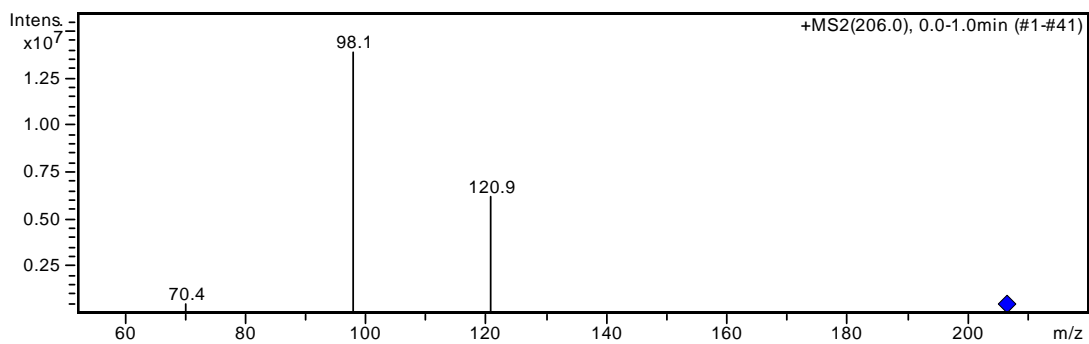

**Figure S3.** CID mass spectrum of the  $[M + H]^+$  ion of Compound **3** ( $R=p\text{-OCH}_3$ ).

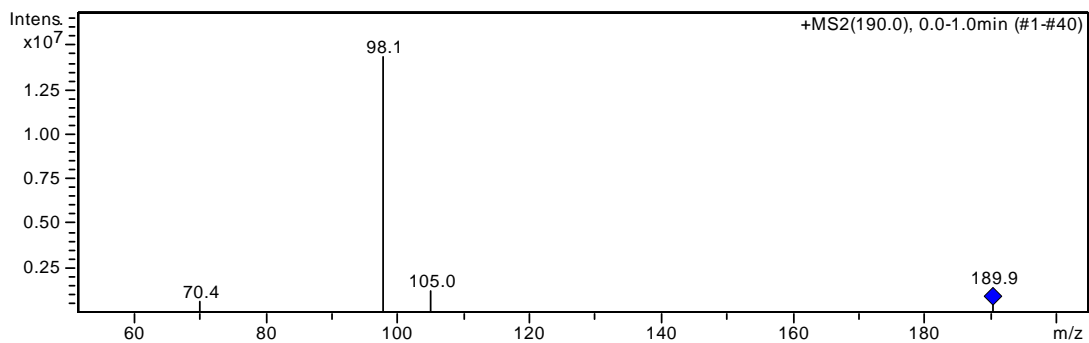

**Figure S4.** CID mass spectrum of the  $[M + H]^+$  ion of Compound **4** ( $R=p\text{-CH}_3$ ).

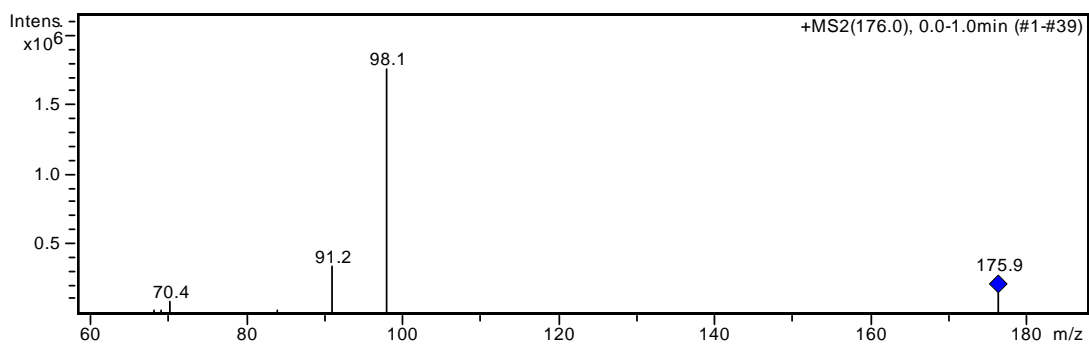

**Figure S5.** CID mass spectrum of the  $[M + H]^+$  ion of Compound **5** ( $R=H$ ).

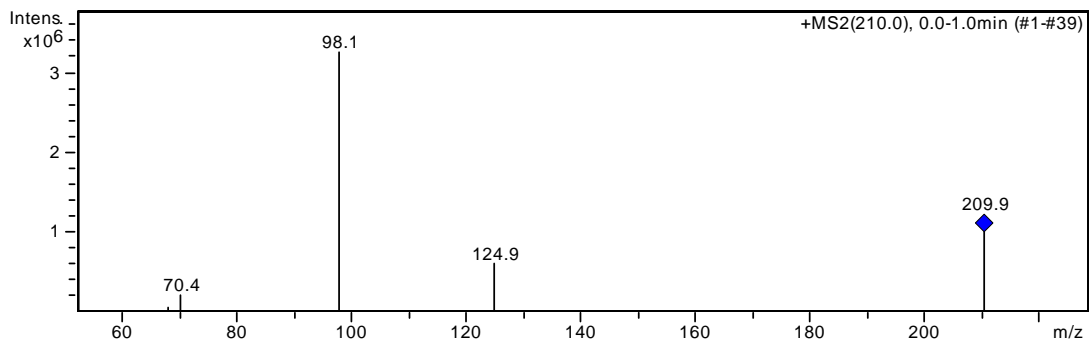

**Figure S6.** CID mass spectrum of the  $[M + H]^+$  ion of Compound **6** ( $R=p\text{-}^{35}\text{Cl}$ ).

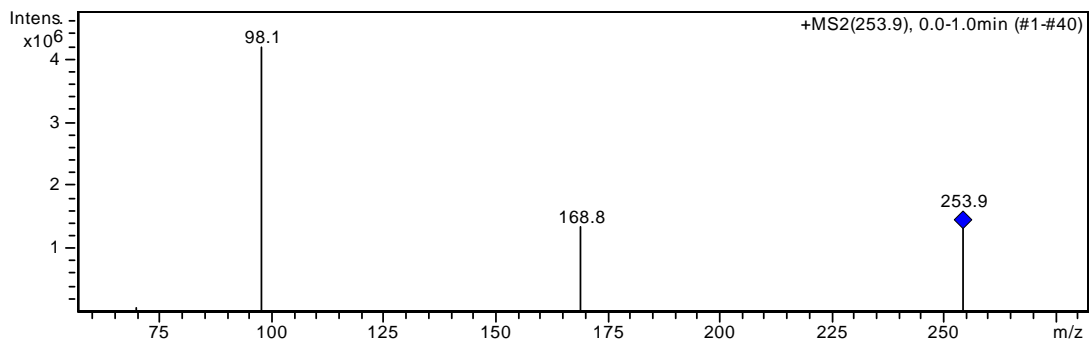

**Figure S7.** CID mass spectrum of the  $[M + H]^+$  ion of Compound **7** ( $R=p\text{-}^{79}\text{Br}$ ).

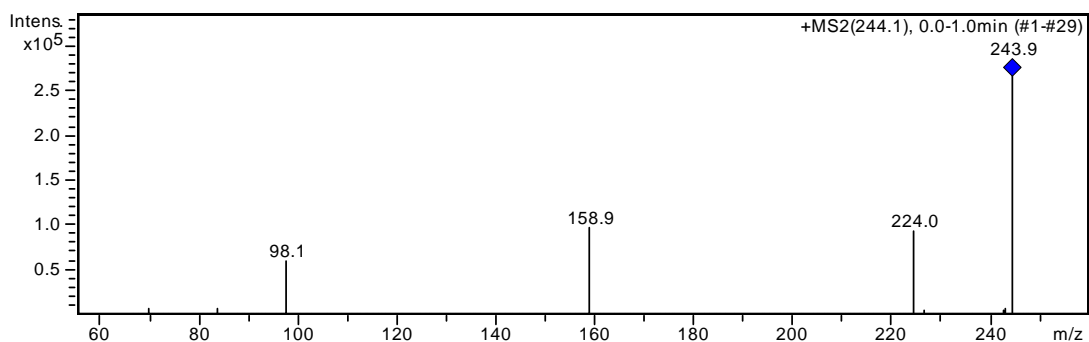

**Figure S8.** CID mass spectrum of the  $[M + H]^+$  ion of Compound **8** ( $R=p\text{-CF}_3$ ).

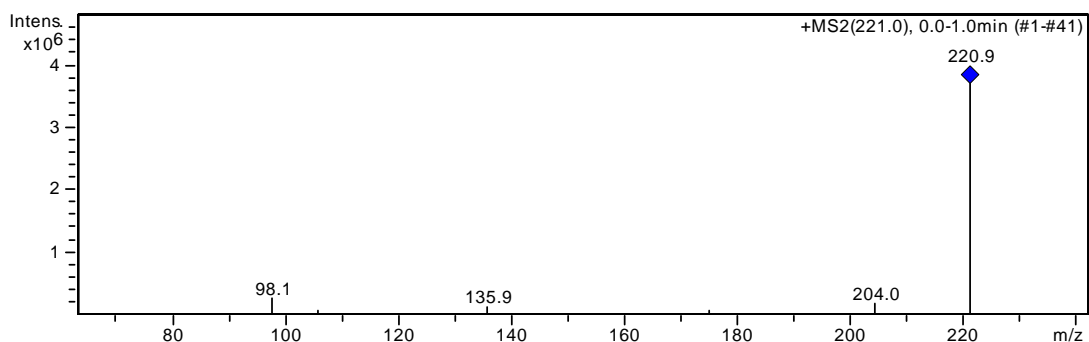

**Figure S9.** CID mass spectrum of the  $[M + H]^+$  ion of Compound **9** ( $R=p\text{-NO}_2$ ).

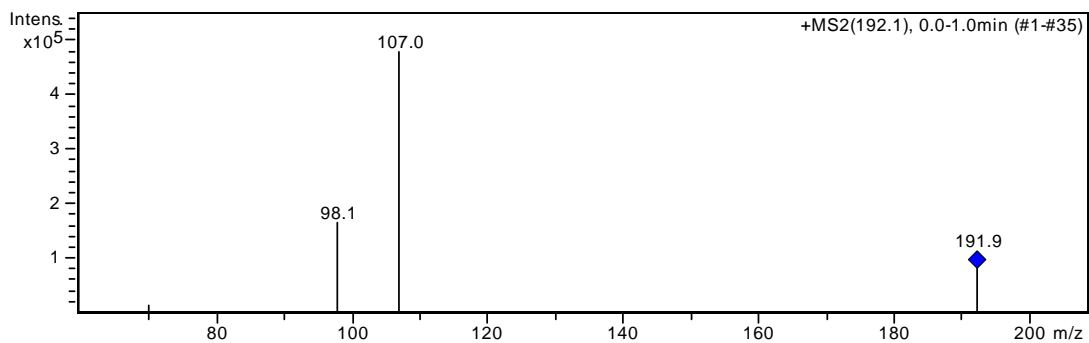

**Figure S10.** CID mass spectrum of the  $[M + H]^+$  ion of Compound **10** ( $R=m\text{-OH}$ ).

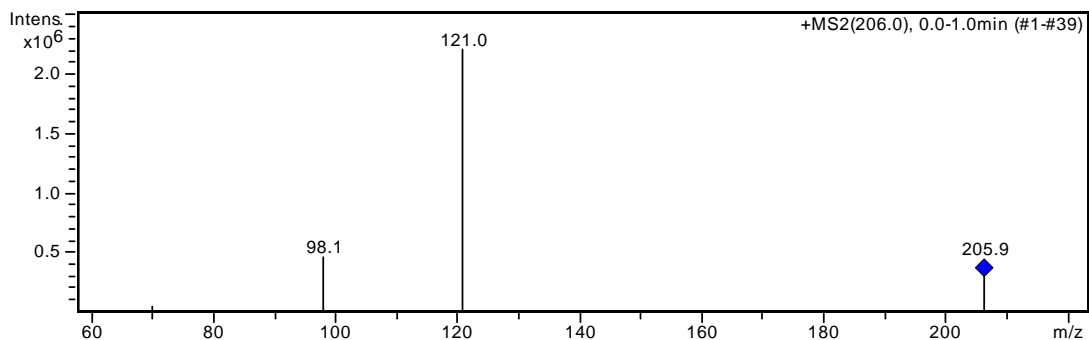

**Figure S11.** CID mass spectrum of the  $[M + H]^+$  ion of Compound **11** ( $R=m\text{-OCH}_3$ ).

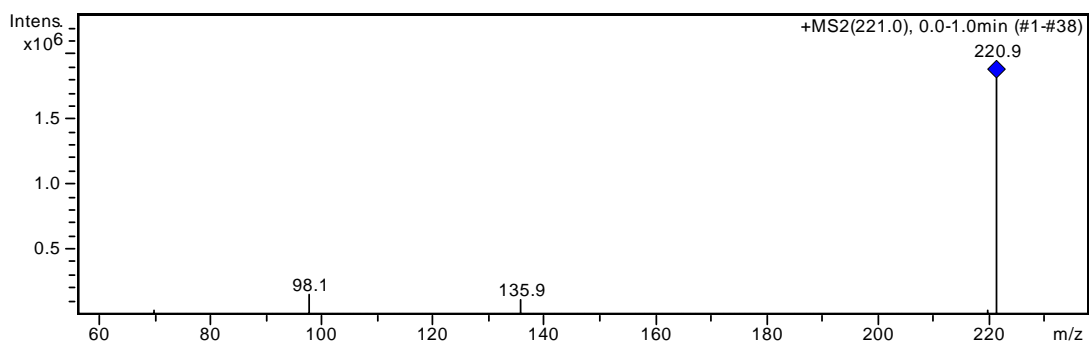

**Figure S12.** CID mass spectrum of the  $[M + H]^+$  ion of Compound 12 ( $R=m\text{-NO}_2$ ).

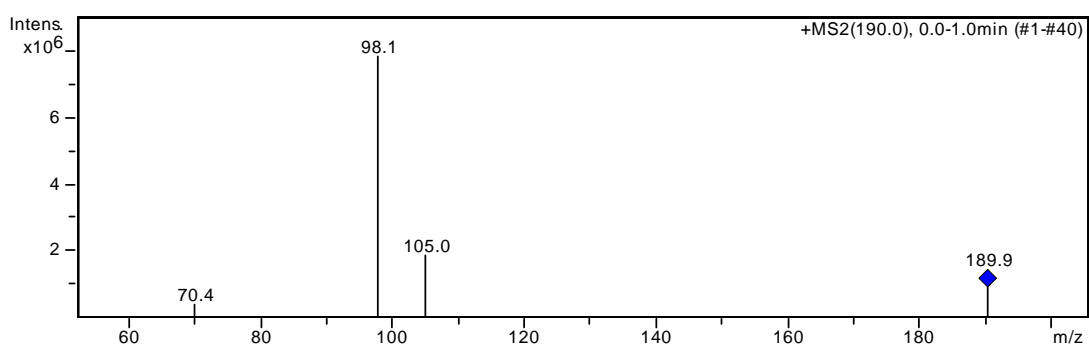

**Figure S13.** CID mass spectrum of the  $[M + H]^+$  ion of Compound 13 ( $R=m\text{-CH}_3$ ).

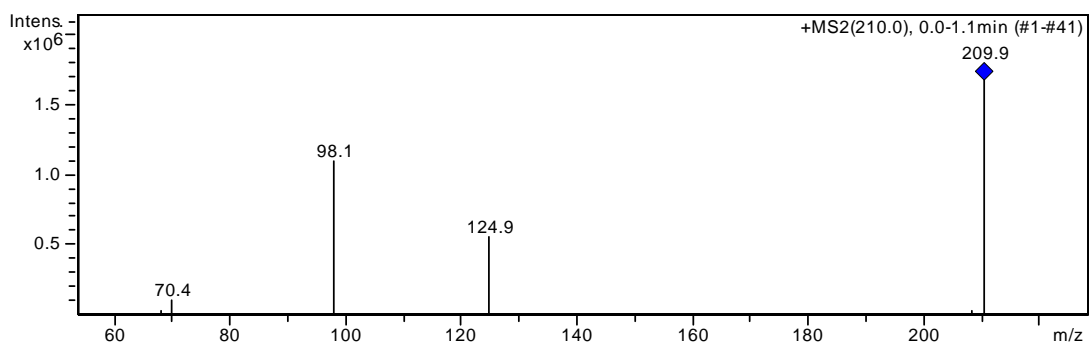

**Figure S14.** CID mass spectrum of the  $[M + H]^+$  ion of Compound 14 ( $R=m\text{-}^{35}\text{Cl}$ ).

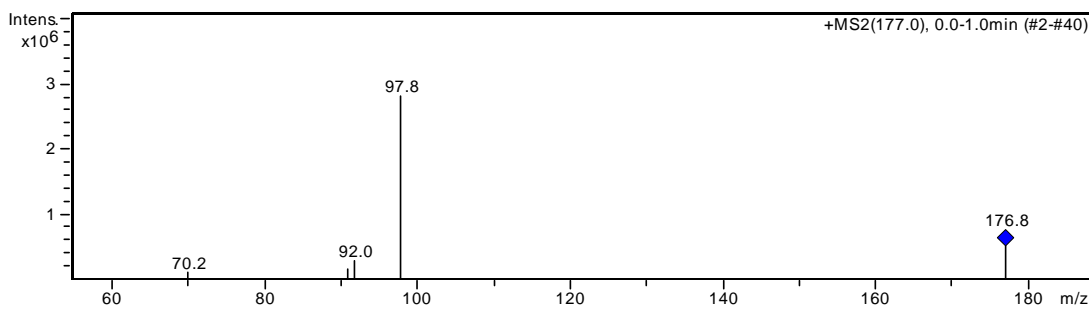

**Figure S15.** CID mass spectrum of the  $[M + D]^+$  ion of Compound 5.

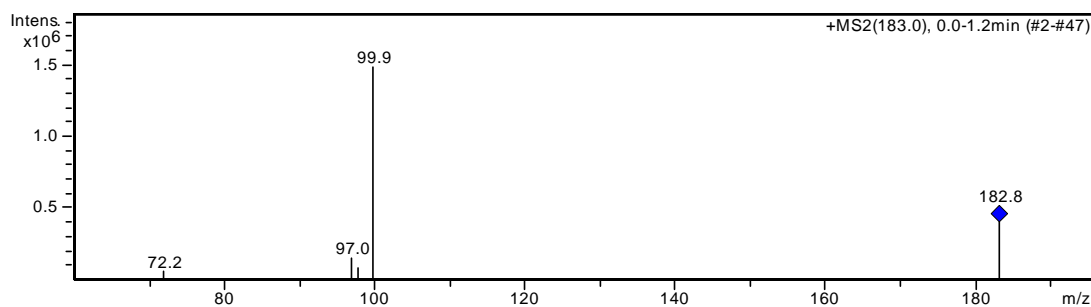

**Figure S16.** CID mass spectrum of the  $[M + H]^+$  ion of Compound **5-d<sub>7</sub>**.

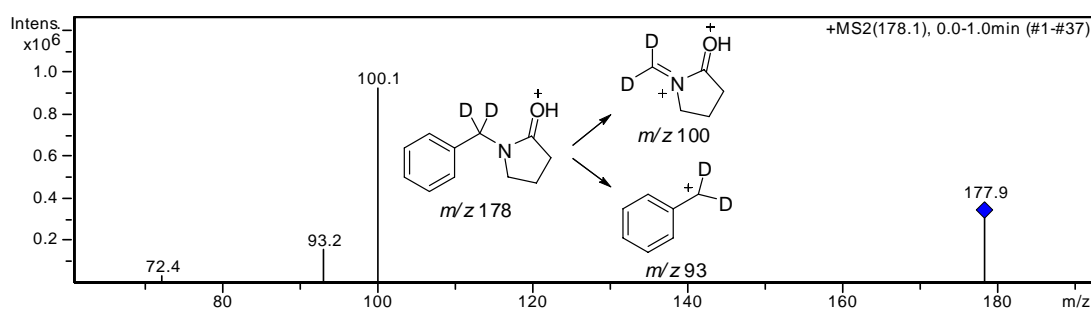

**Figure S17.** CID mass spectrum of the  $[M + H]^+$  ion of Compound **5-d<sub>2</sub>**.

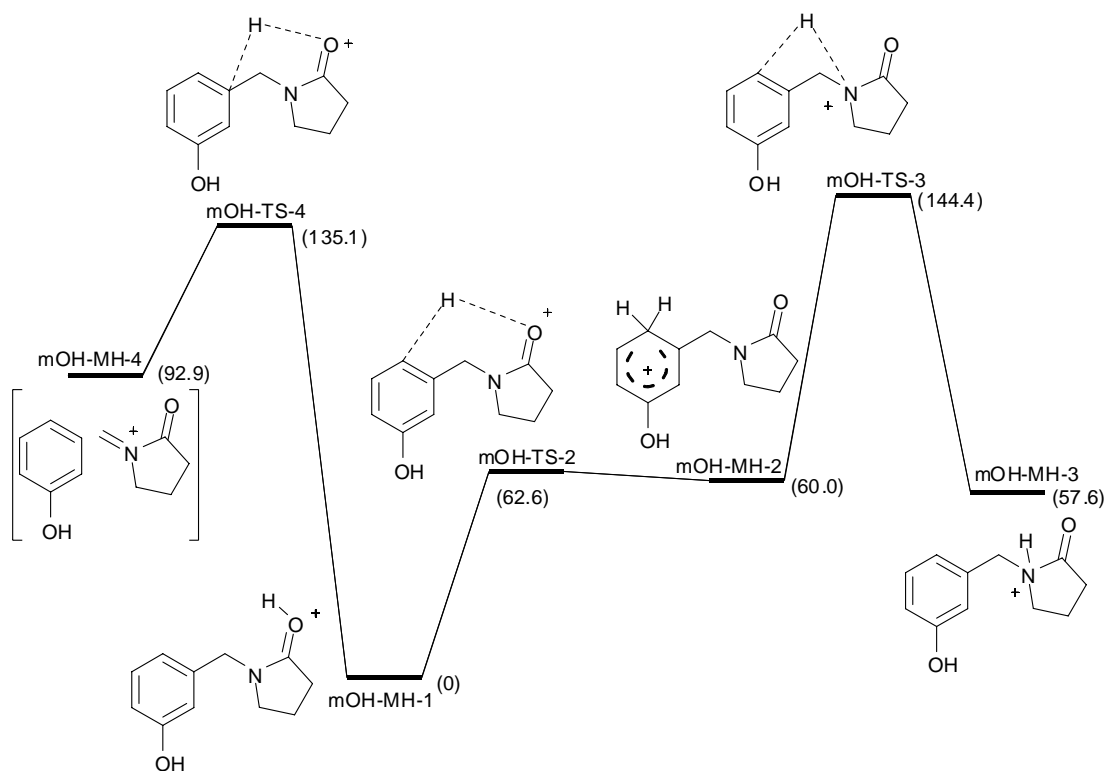

**Figure S18.** The relative energies of proton transfers in the fragmentation of protonated *N*-(3-hydroxybenzyl)butyrolactam using DFT calculations at the B3LYP/6-31++G(d,p) level. Relative energies are given in  $\text{kJ mol}^{-1}$ .



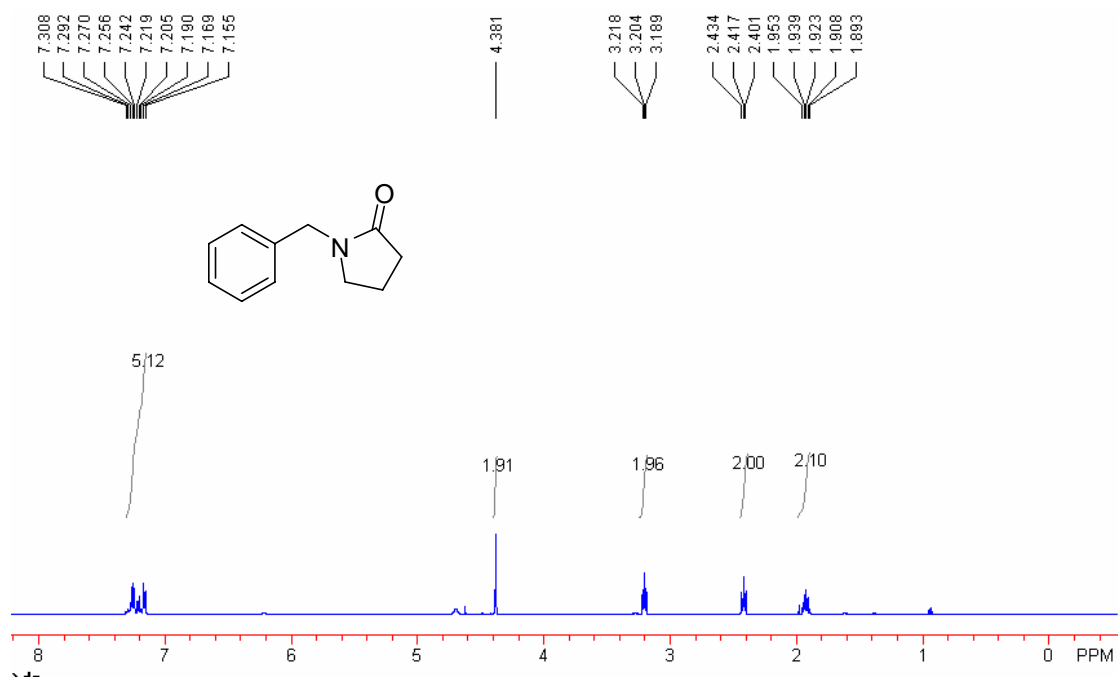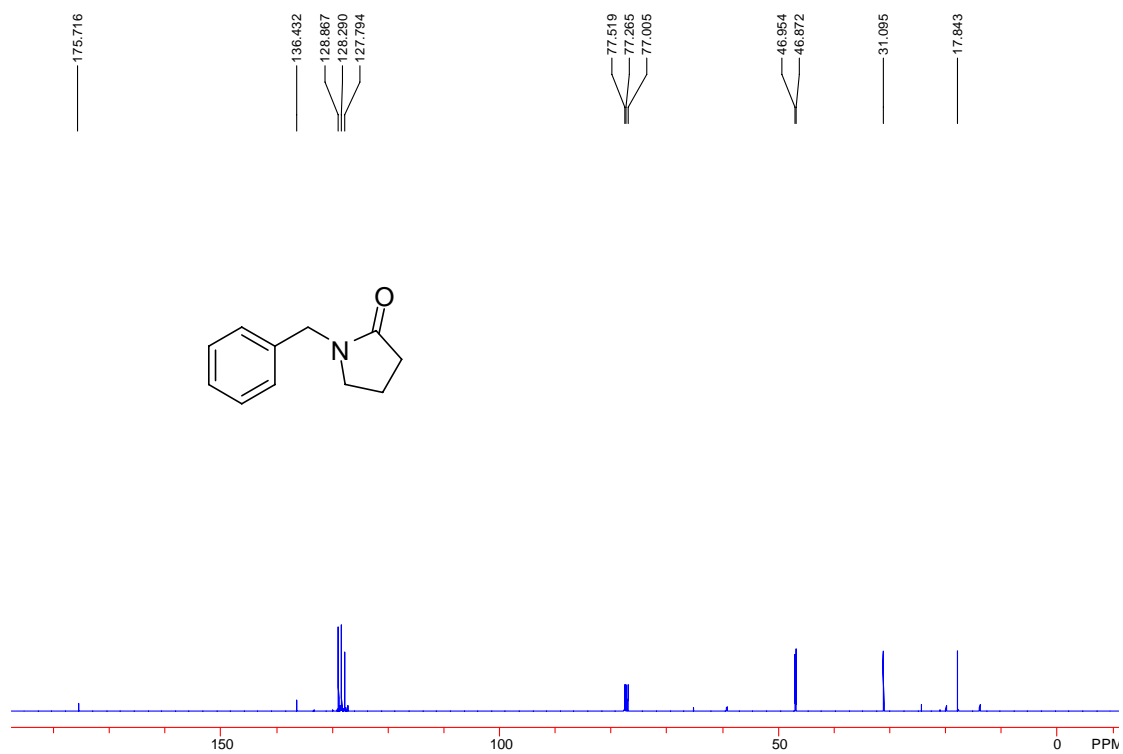

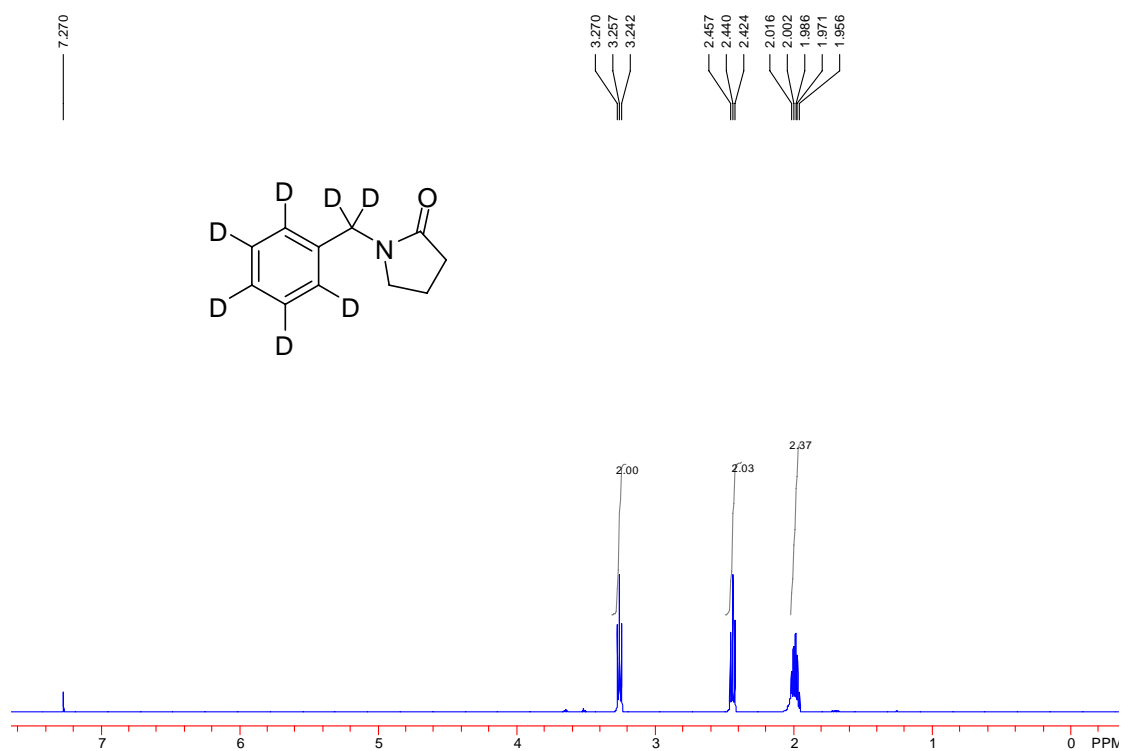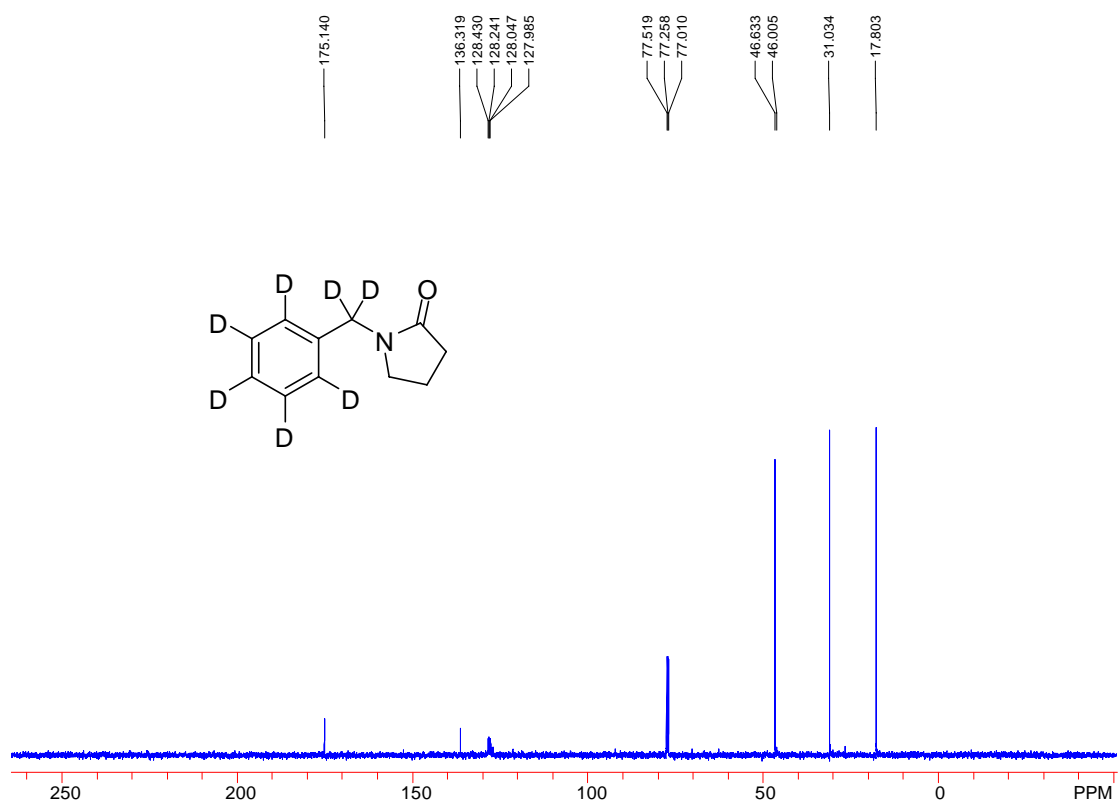

Figures, cartesian coordinates, total energies, zero point energy corrections and the number of imaginary frequencies of all optimized structures discussed in the text at the B3LYP/6-31++G(d,p) level.

### TS-1

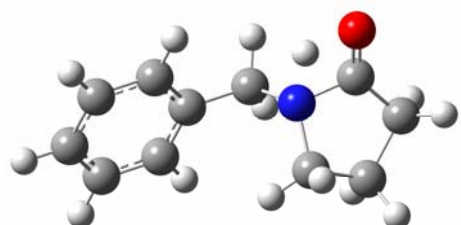

| Center Number | Atomic Number | Atomic Type | Coordinates (Angstroms) |           |           |
|---------------|---------------|-------------|-------------------------|-----------|-----------|
|               |               |             | X                       | Y         | Z         |
| 1             | 6             | 0           | 2.560052                | -1.623536 | 0.359565  |
| 2             | 6             | 0           | 3.425816                | -0.478553 | -0.261587 |
| 3             | 6             | 0           | 1.338869                | -0.917308 | 1.024294  |
| 4             | 1             | 0           | 2.231290                | -2.312623 | -0.421701 |
| 5             | 1             | 0           | 3.124421                | -2.202023 | 1.092817  |
| 6             | 1             | 0           | 3.684655                | -0.648507 | -1.314566 |
| 7             | 1             | 0           | 4.363108                | -0.269552 | 0.264446  |
| 8             | 1             | 0           | 1.545123                | -0.629716 | 2.058084  |
| 9             | 1             | 0           | 0.416034                | -1.496228 | 1.000038  |
| 10            | 6             | 0           | 0.196771                | 0.231446  | -0.975243 |
| 11            | 1             | 0           | 0.355215                | 1.135425  | -1.570418 |
| 12            | 1             | 0           | 0.486814                | -0.640031 | -1.569921 |
| 13            | 7             | 0           | 1.170543                | 0.345515  | 0.216922  |
| 14            | 6             | 0           | 2.511304                | 0.677155  | -0.127032 |
| 15            | 8             | 0           | 2.629307                | 1.911558  | 0.016132  |
| 16            | 1             | 0           | 1.451714                | 1.710524  | 0.460824  |
| 17            | 6             | 0           | -1.222699               | 0.117762  | -0.493483 |
| 18            | 6             | 0           | -1.907497               | -1.100732 | -0.605873 |
| 19            | 6             | 0           | -1.880776               | 1.231906  | 0.050276  |
| 20            | 6             | 0           | -3.232319               | -1.206663 | -0.173985 |
| 21            | 1             | 0           | -1.416785               | -1.963502 | -1.050213 |
| 22            | 6             | 0           | -3.200857               | 1.124015  | 0.485158  |
| 23            | 6             | 0           | -3.876934               | -0.096617 | 0.375220  |
| 24            | 1             | 0           | -3.758280               | -2.150868 | -0.272132 |
| 25            | 1             | 0           | -3.706015               | 1.990926  | 0.898798  |
| 26            | 1             | 0           | -4.906595               | -0.177189 | 0.708900  |
| 27            | 1             | 0           | -1.369334               | 2.189040  | 0.123672  |

---

|                                              |                             |
|----------------------------------------------|-----------------------------|
| Zero-point correction=                       | 0.227383 (Hartree/Particle) |
| Thermal correction to Energy=                | 0.238593                    |
| Thermal correction to Enthalpy=              | 0.239537                    |
| Thermal correction to Gibbs Free Energy=     | 0.188889                    |
| Sum of electronic and zero-point Energies=   | -557.066128                 |
| Sum of electronic and thermal Energies=      | -557.054917                 |
| Sum of electronic and thermal Enthalpies=    | -557.053973                 |
| Sum of electronic and thermal Free Energies= | -557.104621                 |

One imaginary vibrational frequency, -1881.62

TS-2

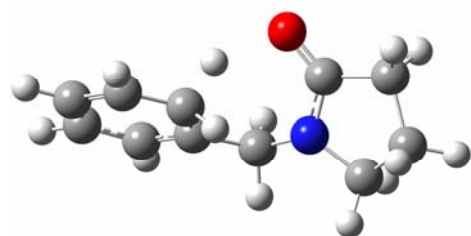

---

| Center Number | Atomic Number | Atomic Type | Coordinates (Angstroms) |           |           |
|---------------|---------------|-------------|-------------------------|-----------|-----------|
|               |               |             | X                       | Y         | Z         |
| 1             | 6             | 0           | -3.540492               | 0.062869  | 0.764438  |
| 2             | 6             | 0           | -3.127077               | -0.955097 | -0.314691 |
| 3             | 6             | 0           | -2.528175               | 1.213328  | 0.598630  |
| 4             | 1             | 0           | -4.569569               | 0.409592  | 0.657206  |
| 5             | 1             | 0           | -3.438667               | -0.379501 | 1.759959  |
| 6             | 1             | 0           | -3.652481               | -0.792642 | -1.264720 |
| 7             | 1             | 0           | -3.277480               | -2.001163 | -0.039767 |
| 8             | 1             | 0           | -2.272522               | 1.699700  | 1.543779  |
| 9             | 1             | 0           | -2.886565               | 1.980583  | -0.100972 |
| 10            | 6             | 0           | -0.152161               | 1.291084  | -0.330577 |
| 11            | 1             | 0           | -0.174029               | 1.519689  | -1.408335 |
| 12            | 1             | 0           | -0.187232               | 2.255722  | 0.187948  |
| 13            | 6             | 0           | 1.179799                | 0.640947  | -0.041880 |
| 14            | 6             | 0           | 2.358589                | 1.259176  | -0.430873 |
| 15            | 6             | 0           | 1.233735                | -0.700881 | 0.526373  |
| 16            | 6             | 0           | 3.586821                | 0.615087  | -0.225271 |
| 17            | 1             | 0           | 2.341554                | 2.240083  | -0.897139 |
| 18            | 6             | 0           | 2.536019                | -1.310593 | 0.745932  |
| 19            | 1             | 0           | 0.514032                | -0.860646 | 1.343586  |
| 20            | 6             | 0           | 3.685880                | -0.670262 | 0.351770  |
| 21            | 1             | 0           | 4.497847                | 1.124913  | -0.527908 |

|    |   |   |           |           |           |
|----|---|---|-----------|-----------|-----------|
| 22 | 1 | 0 | 2.573750  | -2.294718 | 1.204039  |
| 23 | 1 | 0 | 4.658969  | -1.129504 | 0.486279  |
| 24 | 7 | 0 | -1.342744 | 0.534373  | 0.030998  |
| 25 | 6 | 0 | -1.661621 | -0.663386 | -0.555089 |
| 26 | 8 | 0 | -0.850785 | -1.364876 | -1.176024 |
| 27 | 1 | 0 | 0.649966  | -1.287350 | -0.285322 |

---

|                                              |                             |
|----------------------------------------------|-----------------------------|
| Zero-point correction=                       | 0.229095 (Hartree/Particle) |
| Thermal correction to Energy=                | 0.239721                    |
| Thermal correction to Enthalpy=              | 0.240665                    |
| Thermal correction to Gibbs Free Energy=     | 0.192526                    |
| Sum of electronic and zero-point Energies=   | -557.125791                 |
| Sum of electronic and thermal Energies=      | -557.115165                 |
| Sum of electronic and thermal Enthalpies=    | -557.114220                 |
| Sum of electronic and thermal Free Energies= | -557.162360                 |

One imaginary vibrational frequency, -40.8945

TS-3

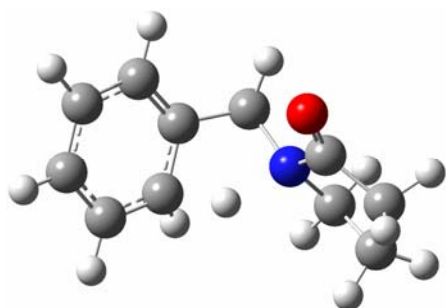

---

| Center<br>Number | Atomic<br>Number | Atomic<br>Type | Coordinates (Angstroms) |           |           |
|------------------|------------------|----------------|-------------------------|-----------|-----------|
|                  |                  |                | X                       | Y         | Z         |
| 1                | 6                | 0              | -3.120339               | -1.022077 | -0.374051 |
| 2                | 6                | 0              | -2.969584               | 0.375219  | -1.002049 |
| 3                | 6                | 0              | -2.232125               | -0.960324 | 0.881321  |
| 4                | 1                | 0              | -4.152804               | -1.269856 | -0.122529 |
| 5                | 1                | 0              | -2.750656               | -1.792784 | -1.057760 |
| 6                | 1                | 0              | -3.733288               | 1.076794  | -0.642704 |
| 7                | 1                | 0              | -3.009609               | 0.395966  | -2.093862 |
| 8                | 1                | 0              | -1.844956               | -1.933234 | 1.196484  |
| 9                | 1                | 0              | -2.755517               | -0.503795 | 1.729952  |
| 10               | 6                | 0              | -0.130951               | 0.455600  | 1.450776  |
| 11               | 1                | 0              | -0.265880               | 1.530910  | 1.584365  |
| 12               | 1                | 0              | -0.299570               | -0.054868 | 2.404010  |
| 13               | 6                | 0              | 1.225438                | 0.121832  | 0.857031  |

|    |   |   |           |           |           |
|----|---|---|-----------|-----------|-----------|
| 14 | 6 | 0 | 2.254511  | 1.020939  | 0.661803  |
| 15 | 6 | 0 | 1.226250  | -1.147450 | 0.173760  |
| 16 | 6 | 0 | 3.301796  | 0.684197  | -0.214876 |
| 17 | 1 | 0 | 2.224765  | 2.005336  | 1.118279  |
| 18 | 6 | 0 | 2.302589  | -1.454359 | -0.712723 |
| 19 | 1 | 0 | 0.779344  | -2.013468 | 0.678394  |
| 20 | 6 | 0 | 3.314551  | -0.529357 | -0.921179 |
| 21 | 1 | 0 | 4.097141  | 1.404456  | -0.383762 |
| 22 | 1 | 0 | 2.346316  | -2.432782 | -1.181728 |
| 23 | 1 | 0 | 4.127998  | -0.748069 | -1.604476 |
| 24 | 7 | 0 | -1.114864 | -0.075176 | 0.455355  |
| 25 | 6 | 0 | -1.633206 | 0.886049  | -0.508868 |
| 26 | 8 | 0 | -1.024365 | 1.886715  | -0.792311 |
| 27 | 1 | 0 | 0.002103  | -0.813702 | -0.219328 |

---

|                                              |                             |
|----------------------------------------------|-----------------------------|
| Zero-point correction=                       | 0.226837 (Hartree/Particle) |
| Thermal correction to Energy=                | 0.237718                    |
| Thermal correction to Enthalpy=              | 0.238662                    |
| Thermal correction to Gibbs Free Energy=     | 0.189487                    |
| Sum of electronic and zero-point Energies=   | -557.099406                 |
| Sum of electronic and thermal Energies=      | -557.088525                 |
| Sum of electronic and thermal Enthalpies=    | -557.087581                 |
| Sum of electronic and thermal Free Energies= | -557.136755                 |

One imaginary vibrational frequency, -1311.39

TS-4

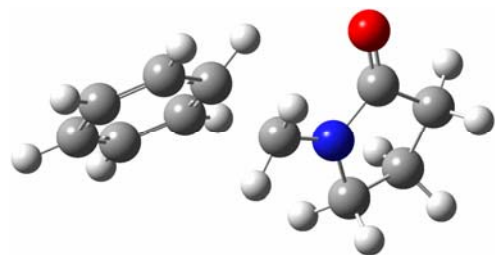


---

| Center Number | Atomic Number | Atomic Type | Coordinates (Angstroms) |           |           |
|---------------|---------------|-------------|-------------------------|-----------|-----------|
|               |               |             | X                       | Y         | Z         |
| 1             | 6             | 0           | 3.034614                | -1.376356 | -0.088756 |
| 2             | 6             | 0           | 3.403616                | 0.087162  | -0.406050 |
| 3             | 6             | 0           | 1.806424                | -1.288154 | 0.849753  |
| 4             | 1             | 0           | 2.762606                | -1.900907 | -1.009633 |
| 5             | 1             | 0           | 3.851717                | -1.930118 | 0.375832  |
| 6             | 1             | 0           | 3.795979                | 0.246337  | -1.412037 |
| 7             | 1             | 0           | 4.140549                | 0.491940  | 0.299316  |

|    |   |   |           |           |           |
|----|---|---|-----------|-----------|-----------|
| 8  | 1 | 0 | 2.082387  | -1.359191 | 1.908082  |
| 9  | 1 | 0 | 1.056753  | -2.060346 | 0.643918  |
| 10 | 6 | 0 | 0.030379  | 0.531441  | 0.985097  |
| 11 | 1 | 0 | -0.434049 | -0.068412 | 1.763302  |
| 12 | 1 | 0 | 0.061424  | 1.596678  | 1.205126  |
| 13 | 6 | 0 | -1.169033 | 0.559996  | -0.373225 |
| 14 | 6 | 0 | -1.369377 | -0.808233 | -0.794537 |
| 15 | 6 | 0 | -2.323454 | 1.265550  | 0.139436  |
| 16 | 6 | 0 | -2.577170 | -1.447526 | -0.595306 |
| 17 | 1 | 0 | -0.539882 | -1.340795 | -1.250907 |
| 18 | 6 | 0 | -3.524245 | 0.617378  | 0.342102  |
| 19 | 1 | 0 | -2.216475 | 2.315604  | 0.399332  |
| 20 | 6 | 0 | -3.647457 | -0.738586 | -0.018620 |
| 21 | 1 | 0 | -2.710473 | -2.483522 | -0.888268 |
| 22 | 1 | 0 | -4.375708 | 1.146430  | 0.756790  |
| 23 | 1 | 0 | -4.593930 | -1.246844 | 0.144106  |
| 24 | 7 | 0 | 1.260244  | 0.051210  | 0.576313  |
| 25 | 6 | 0 | 2.111526  | 0.849842  | -0.209494 |
| 26 | 8 | 0 | 1.769858  | 1.944095  | -0.617286 |
| 27 | 1 | 0 | -0.516409 | 1.166837  | -1.013263 |

---

Zero-point correction= 0.230519 (Hartree/Particle)  
Thermal correction to Energy= 0.241739  
Thermal correction to Enthalpy= 0.242683  
Thermal correction to Gibbs Free Energy= 0.192601  
Sum of electronic and zero-point Energies= -557.113931  
Sum of electronic and thermal Energies= -557.102711  
Sum of electronic and thermal Enthalpies= -557.101767  
Sum of electronic and thermal Free Energies= -557.151849  
**One imaginary vibrational frequency, -101.256**

### TS-5

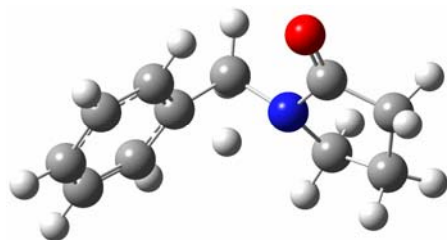

---

| Center<br>Number | Atomic<br>Number | Atomic<br>Type | Coordinates (Angstroms) |           |           |
|------------------|------------------|----------------|-------------------------|-----------|-----------|
|                  |                  |                | X                       | Y         | Z         |
| 1                | 6                | 0              | -3.024168               | -0.986714 | -0.968350 |

---

|    |   |   |           |           |           |
|----|---|---|-----------|-----------|-----------|
| 2  | 6 | 0 | -3.165520 | 0.522201  | -0.697115 |
| 3  | 6 | 0 | -2.056690 | -1.472344 | 0.127154  |
| 4  | 1 | 0 | -3.975325 | -1.519854 | -0.928007 |
| 5  | 1 | 0 | -2.585622 | -1.159385 | -1.955884 |
| 6  | 1 | 0 | -4.002116 | 0.745912  | -0.022589 |
| 7  | 1 | 0 | -3.302243 | 1.139280  | -1.588302 |
| 8  | 1 | 0 | -1.473902 | -2.350304 | -0.162163 |
| 9  | 1 | 0 | -2.576428 | -1.691779 | 1.068787  |
| 10 | 6 | 0 | -0.141995 | -0.252430 | 1.421272  |
| 11 | 1 | 0 | -0.312863 | 0.615902  | 2.060236  |
| 12 | 1 | 0 | -0.185856 | -1.170570 | 2.009182  |
| 13 | 6 | 0 | 1.137880  | -0.143947 | 0.581244  |
| 14 | 6 | 0 | 1.643056  | 1.148560  | 0.205241  |
| 15 | 6 | 0 | 1.958575  | -1.296955 | 0.335082  |
| 16 | 6 | 0 | 2.835971  | 1.251044  | -0.496275 |
| 17 | 1 | 0 | 1.048602  | 2.028350  | 0.433288  |
| 18 | 6 | 0 | 3.144946  | -1.172024 | -0.367431 |
| 19 | 1 | 0 | 1.623737  | -2.272335 | 0.677639  |
| 20 | 6 | 0 | 3.582592  | 0.098810  | -0.777720 |
| 21 | 1 | 0 | 3.199703  | 2.225047  | -0.806122 |
| 22 | 1 | 0 | 3.747395  | -2.048878 | -0.580042 |
| 23 | 1 | 0 | 4.520646  | 0.189522  | -1.317473 |
| 24 | 7 | 0 | -1.168099 | -0.300662 | 0.326370  |
| 25 | 6 | 0 | -1.897057 | 0.909856  | 0.030624  |
| 26 | 8 | 0 | -1.481626 | 1.998813  | 0.352058  |
| 27 | 1 | 0 | 0.198433  | -0.253114 | -0.351962 |

---

|                                              |                             |
|----------------------------------------------|-----------------------------|
| Zero-point correction=                       | 0.226491 (Hartree/Particle) |
| Thermal correction to Energy=                | 0.237555                    |
| Thermal correction to Enthalpy=              | 0.238499                    |
| Thermal correction to Gibbs Free Energy=     | 0.188928                    |
| Sum of electronic and zero-point Energies=   | -557.089560                 |
| Sum of electronic and thermal Energies=      | -557.078497                 |
| Sum of electronic and thermal Enthalpies=    | -557.077552                 |
| Sum of electronic and thermal Free Energies= | -557.127123                 |

One imaginary vibrational frequency, -1300.16

TS-6



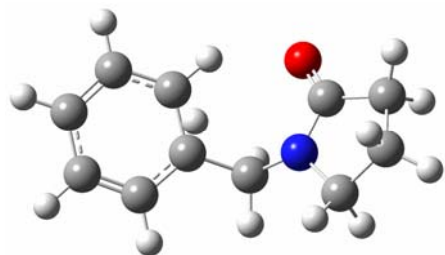

---

| Center Number | Atomic Number | Atomic Type | Coordinates (Angstroms) |           |           |
|---------------|---------------|-------------|-------------------------|-----------|-----------|
|               |               |             | X                       | Y         | Z         |
| 1             | 6             | 0           | -3.328626               | -0.674290 | -0.972436 |
| 2             | 6             | 0           | -3.296962               | 0.727260  | -0.335430 |
| 3             | 6             | 0           | -2.260240               | -1.466525 | -0.191358 |
| 4             | 1             | 0           | -4.308107               | -1.152225 | -0.915702 |
| 5             | 1             | 0           | -3.045933               | -0.615419 | -2.027964 |
| 6             | 1             | 0           | -4.003968               | 0.822290  | 0.498606  |
| 7             | 1             | 0           | -3.503221               | 1.547092  | -1.026515 |
| 8             | 1             | 0           | -1.758400               | -2.220506 | -0.804489 |
| 9             | 1             | 0           | -2.682678               | -1.964270 | 0.692453  |
| 10            | 6             | 0           | -0.153425               | -0.685635 | 1.056813  |
| 11            | 1             | 0           | -0.214982               | -0.095124 | 1.979664  |
| 12            | 1             | 0           | -0.156231               | -1.744340 | 1.325206  |
| 13            | 6             | 0           | 1.186164                | -0.356771 | 0.387236  |
| 14            | 6             | 0           | 2.228328                | -1.333026 | 0.265760  |
| 15            | 6             | 0           | 1.500027                | 1.017182  | 0.028414  |
| 16            | 6             | 0           | 3.472622                | -0.975730 | -0.214575 |
| 17            | 1             | 0           | 2.024173                | -2.356483 | 0.564208  |
| 18            | 6             | 0           | 2.783919                | 1.345514  | -0.468301 |
| 19            | 1             | 0           | 0.936759                | 0.060399  | -0.781894 |
| 20            | 6             | 0           | 3.753010                | 0.362661  | -0.579113 |
| 21            | 1             | 0           | 4.249616                | -1.728040 | -0.307418 |
| 22            | 1             | 0           | 2.995673                | 2.375660  | -0.733799 |
| 23            | 1             | 0           | 4.741156                | 0.617779  | -0.949335 |
| 24            | 7             | 0           | -1.315386               | -0.410750 | 0.224282  |
| 25            | 6             | 0           | -1.900366               | 0.844331  | 0.243480  |
| 26            | 8             | 0           | -1.335386               | 1.842882  | 0.677789  |
| 27            | 1             | 0           | 0.710230                | 1.755552  | 0.171755  |

---

Zero-point correction= 0.228035 (Hartree/Particle)  
Thermal correction to Energy= 0.239217  
Thermal correction to Enthalpy= 0.240162  
Thermal correction to Gibbs Free Energy= 0.189705  
Sum of electronic and zero-point Energies= -557.098966

Sum of electronic and thermal Energies= -557.087783  
Sum of electronic and thermal Enthalpies= -557.086839  
Sum of electronic and thermal Free Energies= -557.137295

One imaginary vibrational frequency, -717.678

MH-1

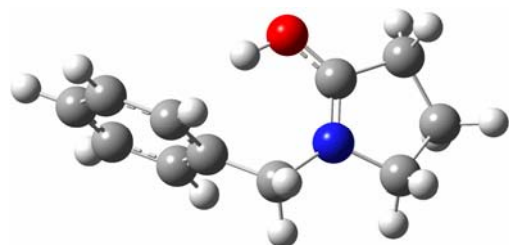

| Center Number | Atomic Number | Atomic Type | Coordinates (Angstroms) |           |           |
|---------------|---------------|-------------|-------------------------|-----------|-----------|
|               |               |             | X                       | Y         | Z         |
| 1             | 6             | 0           | -3.607513               | -0.143050 | 0.531640  |
| 2             | 6             | 0           | -2.894236               | 1.212644  | 0.342926  |
| 3             | 6             | 0           | -2.713431               | -1.148296 | -0.220291 |
| 4             | 1             | 0           | -3.650698               | -0.400582 | 1.592874  |
| 5             | 1             | 0           | -4.627305               | -0.138520 | 0.145497  |
| 6             | 1             | 0           | -2.907036               | 1.863727  | 1.220841  |
| 7             | 1             | 0           | -3.293761               | 1.797183  | -0.496343 |
| 8             | 1             | 0           | -3.045870               | -1.338477 | -1.246903 |
| 9             | 1             | 0           | -2.603441               | -2.106306 | 0.292393  |
| 10            | 6             | 0           | -0.197540               | -1.211777 | -0.777281 |
| 11            | 1             | 0           | -0.319978               | -2.236024 | -0.414966 |
| 12            | 1             | 0           | -0.266160               | -1.238035 | -1.870528 |
| 13            | 6             | 0           | 1.135001                | -0.647831 | -0.329603 |
| 14            | 6             | 0           | 1.593026                | -0.864057 | 0.981314  |
| 15            | 6             | 0           | 1.942230                | 0.069797  | -1.230440 |
| 16            | 6             | 0           | 2.826572                | -0.355227 | 1.388024  |
| 17            | 1             | 0           | 0.990289                | -1.438600 | 1.680254  |
| 18            | 6             | 0           | 3.178907                | 0.579796  | -0.818131 |
| 19            | 1             | 0           | 1.617773                | 0.211242  | -2.258941 |
| 20            | 6             | 0           | 3.618965                | 0.369494  | 0.490261  |
| 21            | 1             | 0           | 3.174817                | -0.531784 | 2.400651  |
| 22            | 1             | 0           | 3.797639                | 1.126087  | -1.522692 |
| 23            | 1             | 0           | 4.580457                | 0.759437  | 0.808444  |
| 24            | 7             | 0           | -1.387366               | -0.469382 | -0.275843 |
| 25            | 6             | 0           | -1.496040               | 0.809235  | -0.002027 |
| 26            | 8             | 0           | -0.547749               | 1.701591  | -0.034480 |
| 27            | 1             | 0           | 0.331173                | 1.319220  | -0.262187 |

---

|                                              |                             |
|----------------------------------------------|-----------------------------|
| Zero-point correction=                       | 0.233513 (Hartree/Particle) |
| Thermal correction to Energy=                | 0.244785                    |
| Thermal correction to Enthalpy=              | 0.245729                    |
| Thermal correction to Gibbs Free Energy=     | 0.195194                    |
| Sum of electronic and zero-point Energies=   | -557.165227                 |
| Sum of electronic and thermal Energies=      | -557.153955                 |
| Sum of electronic and thermal Enthalpies=    | -557.153011                 |
| Sum of electronic and thermal Free Energies= | -557.203546                 |

No imaginary vibrational frequency

MH-2

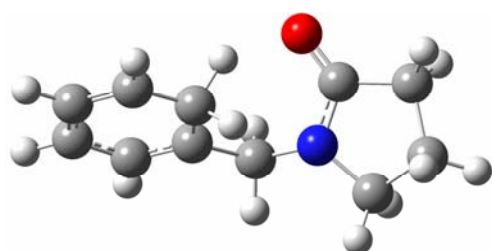

---

| Center<br>Number | Atomic<br>Number | Atomic<br>Type | Coordinates (Angstroms) |           |           |
|------------------|------------------|----------------|-------------------------|-----------|-----------|
|                  |                  |                | X                       | Y         | Z         |
| 1                | 6                | 0              | -3.495190               | 0.114398  | 0.854264  |
| 2                | 6                | 0              | -3.166560               | -0.922248 | -0.236387 |
| 3                | 6                | 0              | -2.470223               | 1.242239  | 0.619500  |
| 4                | 1                | 0              | -4.521278               | 0.482351  | 0.803730  |
| 5                | 1                | 0              | -3.344875               | -0.321044 | 1.846803  |
| 6                | 1                | 0              | -3.740812               | -0.755617 | -1.156879 |
| 7                | 1                | 0              | -3.325979               | -1.961876 | 0.057213  |
| 8                | 1                | 0              | -2.157073               | 1.735723  | 1.543474  |
| 9                | 1                | 0              | -2.851139               | 2.007112  | -0.070925 |
| 10               | 6                | 0              | -0.143546               | 1.237594  | -0.444795 |
| 11               | 1                | 0              | -0.161680               | 1.324155  | -1.544531 |
| 12               | 1                | 0              | -0.174361               | 2.259916  | -0.054042 |
| 13               | 6                | 0              | 1.186195                | 0.616066  | -0.094935 |
| 14               | 6                | 0              | 2.370804                | 1.262979  | -0.411261 |
| 15               | 6                | 0              | 1.235803                | -0.736418 | 0.459843  |
| 16               | 6                | 0              | 3.598950                | 0.635670  | -0.157596 |
| 17               | 1                | 0              | 2.359463                | 2.254837  | -0.853826 |
| 18               | 6                | 0              | 2.542665                | -1.328495 | 0.725422  |
| 19               | 1                | 0              | 0.516099                | -0.874821 | 1.283901  |
| 20               | 6                | 0              | 3.696034                | -0.659520 | 0.400873  |
| 21               | 1                | 0              | 4.514114                | 1.168914  | -0.402339 |

|    |   |   |           |           |           |
|----|---|---|-----------|-----------|-----------|
| 22 | 1 | 0 | 2.576889  | -2.320821 | 1.166010  |
| 23 | 1 | 0 | 4.670895  | -1.101701 | 0.574155  |
| 24 | 7 | 0 | -1.332813 | 0.529185  | 0.001254  |
| 25 | 6 | 0 | -1.709581 | -0.666951 | -0.562222 |
| 26 | 8 | 0 | -0.947092 | -1.378539 | -1.223894 |
| 27 | 1 | 0 | 0.674043  | -1.344992 | -0.326618 |

---

|                                              |                             |
|----------------------------------------------|-----------------------------|
| Zero-point correction=                       | 0.229584 (Hartree/Particle) |
| Thermal correction to Energy=                | 0.241063                    |
| Thermal correction to Enthalpy=              | 0.242007                    |
| Thermal correction to Gibbs Free Energy=     | 0.191236                    |
| Sum of electronic and zero-point Energies=   | -557.125318                 |
| Sum of electronic and thermal Energies=      | -557.113839                 |
| Sum of electronic and thermal Enthalpies=    | -557.112894                 |
| Sum of electronic and thermal Free Energies= | -557.163666                 |

No imaginary vibrational frequency

MH-3

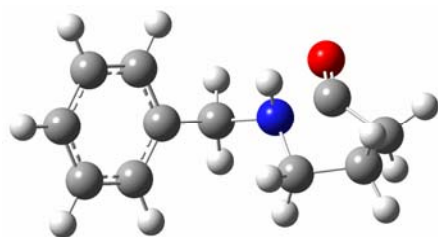

---

| Center Number | Atomic Number | Atomic Type | Coordinates (Angstroms) |           |           |
|---------------|---------------|-------------|-------------------------|-----------|-----------|
|               |               |             | X                       | Y         | Z         |
| 1             | 6             | 0           | -2.749570               | -1.527155 | -0.769136 |
| 2             | 6             | 0           | -3.559559               | -0.375321 | -0.153055 |
| 3             | 6             | 0           | -1.345276               | -1.368237 | -0.169293 |
| 4             | 1             | 0           | -3.166793               | -2.507623 | -0.533975 |
| 5             | 1             | 0           | -2.715769               | -1.436813 | -1.859923 |
| 6             | 1             | 0           | -3.978523               | -0.642828 | 0.827288  |
| 7             | 1             | 0           | -4.390231               | -0.010026 | -0.762802 |
| 8             | 1             | 0           | -0.545873               | -1.835566 | -0.743765 |
| 9             | 1             | 0           | -1.301808               | -1.728483 | 0.861813  |
| 10            | 6             | 0           | -0.099818               | 0.659708  | 0.880177  |
| 11            | 1             | 0           | -0.285328               | 1.735054  | 0.928327  |
| 12            | 1             | 0           | -0.352420               | 0.212030  | 1.844006  |
| 13            | 6             | 0           | 1.300229                | 0.335995  | 0.435649  |
| 14            | 6             | 0           | 1.935364                | 1.153178  | -0.513965 |
| 15            | 6             | 0           | 1.979814                | -0.775895 | 0.954204  |

|    |   |   |           |           |           |
|----|---|---|-----------|-----------|-----------|
| 16 | 6 | 0 | 3.224225  | 0.847911  | -0.954270 |
| 17 | 1 | 0 | 1.437017  | 2.044566  | -0.890589 |
| 18 | 6 | 0 | 3.272135  | -1.075496 | 0.517949  |
| 19 | 1 | 0 | 1.511496  | -1.396534 | 1.714311  |
| 20 | 6 | 0 | 3.891653  | -0.267986 | -0.439941 |
| 21 | 1 | 0 | 3.712390  | 1.488210  | -1.681932 |
| 22 | 1 | 0 | 3.796706  | -1.930950 | 0.931334  |
| 23 | 1 | 0 | 4.897869  | -0.499214 | -0.774709 |
| 24 | 7 | 0 | -1.133205 | 0.124960  | -0.118490 |
| 25 | 6 | 0 | -2.578798 | 0.740986  | 0.077016  |
| 26 | 8 | 0 | -2.685657 | 1.888137  | 0.353060  |
| 27 | 1 | 0 | -0.823438 | 0.442230  | -1.046441 |

---

|                                              |                             |
|----------------------------------------------|-----------------------------|
| Zero-point correction=                       | 0.233265 (Hartree/Particle) |
| Thermal correction to Energy=                | 0.244673                    |
| Thermal correction to Enthalpy=              | 0.245617                    |
| Thermal correction to Gibbs Free Energy=     | 0.194217                    |
| Sum of electronic and zero-point Energies=   | -557.144215                 |
| Sum of electronic and thermal Energies=      | -557.132806                 |
| Sum of electronic and thermal Enthalpies=    | -557.131862                 |
| Sum of electronic and thermal Free Energies= | -557.183262                 |

No imaginary vibrational frequency

MH-4

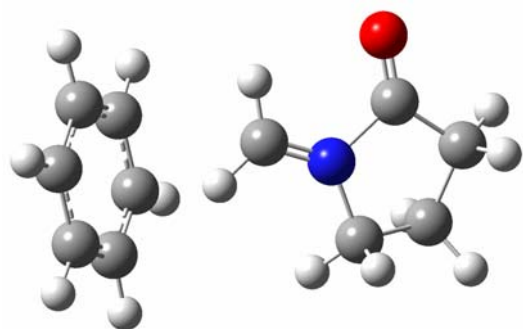

---

| Center Number | Atomic Number | Atomic Type | Coordinates (Angstroms) |           |           |
|---------------|---------------|-------------|-------------------------|-----------|-----------|
|               |               |             | X                       | Y         | Z         |
| 1             | 6             | 0           | -2.967803               | -1.452529 | 0.362879  |
| 2             | 6             | 0           | -3.653641               | -0.084177 | 0.190793  |
| 3             | 6             | 0           | -1.709509               | -1.379420 | -0.524191 |
| 4             | 1             | 0           | -2.682370               | -1.604069 | 1.407850  |
| 5             | 1             | 0           | -3.610248               | -2.282703 | 0.066946  |
| 6             | 1             | 0           | -4.250677               | 0.241954  | 1.045245  |

|    |   |   |           |           |           |
|----|---|---|-----------|-----------|-----------|
| 7  | 1 | 0 | -4.310505 | -0.061518 | -0.690398 |
| 8  | 1 | 0 | -1.927098 | -1.640472 | -1.565155 |
| 9  | 1 | 0 | -0.871951 | -1.982017 | -0.169499 |
| 10 | 6 | 0 | -0.203122 | 0.595114  | -0.735319 |
| 11 | 1 | 0 | 0.641717  | -0.007662 | -1.055722 |
| 12 | 1 | 0 | -0.132416 | 1.677449  | -0.655094 |
| 13 | 6 | 0 | 2.161277  | 0.745974  | 1.243489  |
| 14 | 6 | 0 | 1.972996  | -0.645311 | 1.288442  |
| 15 | 6 | 0 | 2.872071  | 1.322305  | 0.181752  |
| 16 | 6 | 0 | 2.489963  | -1.455876 | 0.269283  |
| 17 | 1 | 0 | 1.464213  | -1.094902 | 2.136832  |
| 18 | 6 | 0 | 3.376065  | 0.513162  | -0.841232 |
| 19 | 1 | 0 | 3.046162  | 2.394156  | 0.163296  |
| 20 | 6 | 0 | 3.184159  | -0.875416 | -0.798708 |
| 21 | 1 | 0 | 2.377091  | -2.535042 | 0.320926  |
| 22 | 1 | 0 | 3.937669  | 0.956703  | -1.657832 |
| 23 | 1 | 0 | 3.599523  | -1.503182 | -1.581391 |
| 24 | 7 | 0 | -1.343024 | 0.056367  | -0.486991 |
| 25 | 6 | 0 | -2.539184 | 0.892678  | -0.058589 |
| 26 | 8 | 0 | -2.447060 | 2.077353  | 0.014470  |
| 27 | 1 | 0 | 1.796901  | 1.368883  | 2.055584  |

---

|                                              |                             |
|----------------------------------------------|-----------------------------|
| Zero-point correction=                       | 0.229172 (Hartree/Particle) |
| Thermal correction to Energy=                | 0.241947                    |
| Thermal correction to Enthalpy=              | 0.242891                    |
| Thermal correction to Gibbs Free Energy=     | 0.186130                    |
| Sum of electronic and zero-point Energies=   | -557.128791                 |
| Sum of electronic and thermal Energies=      | -557.116016                 |
| Sum of electronic and thermal Enthalpies=    | -557.115072                 |
| Sum of electronic and thermal Free Energies= | -557.171833                 |

No imaginary vibrational frequency

### Ion a, benzyl cation

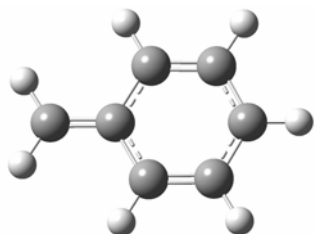

---

| Center<br>Number | Atomic<br>Number | Atomic<br>Type | Coordinates (Angstroms) |   |   |
|------------------|------------------|----------------|-------------------------|---|---|
|                  |                  |                | X                       | Y | Z |

---

|    |   |   |           |           |           |
|----|---|---|-----------|-----------|-----------|
| 1  | 6 | 0 | -1.122348 | -1.236151 | 0.000008  |
| 2  | 6 | 0 | 0.254527  | -1.246752 | 0.000010  |
| 3  | 6 | 0 | 0.983938  | 0.000001  | -0.000035 |
| 4  | 6 | 0 | 0.254526  | 1.246753  | 0.000017  |
| 5  | 6 | 0 | -1.122349 | 1.236151  | 0.000003  |
| 6  | 6 | 0 | -1.804095 | -0.000001 | -0.000019 |
| 7  | 1 | 0 | -1.684838 | -2.163383 | 0.000028  |
| 8  | 1 | 0 | 0.807304  | -2.181549 | 0.000016  |
| 9  | 1 | 0 | 0.807302  | 2.181551  | 0.000026  |
| 10 | 1 | 0 | -1.684840 | 2.163381  | 0.000014  |
| 11 | 1 | 0 | -2.890964 | -0.000001 | 0.000037  |
| 12 | 6 | 0 | 2.355440  | 0.000000  | -0.000064 |
| 13 | 1 | 0 | 2.924095  | -0.926896 | 0.000185  |
| 14 | 1 | 0 | 2.924097  | 0.926895  | 0.000185  |

---

|                                              |                             |
|----------------------------------------------|-----------------------------|
| Zero-point correction=                       | 0.117067 (Hartree/Particle) |
| Thermal correction to Energy=                | 0.122729                    |
| Thermal correction to Enthalpy=              | 0.123673                    |
| Thermal correction to Gibbs Free Energy=     | 0.087911                    |
| Sum of electronic and zero-point Energies=   | -270.560288                 |
| Sum of electronic and thermal Energies=      | -270.554626                 |
| Sum of electronic and thermal Enthalpies=    | -270.553682                 |
| Sum of electronic and thermal Free Energies= | -270.589445                 |

No imaginary vibrational frequency

### Butyrolactam

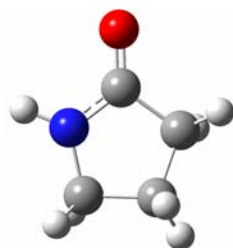

---

| Center Number | Atomic Number | Atomic Type | Coordinates (Angstroms) |           |           |
|---------------|---------------|-------------|-------------------------|-----------|-----------|
|               |               |             | X                       | Y         | Z         |
| 1             | 6             | 0           | -1.415659               | 0.695307  | -0.185759 |
| 2             | 6             | 0           | -0.006231               | 1.224377  | 0.136790  |
| 3             | 6             | 0           | -1.329965               | -0.817345 | 0.131049  |
| 4             | 1             | 0           | -2.208805               | 1.187684  | 0.382338  |
| 5             | 1             | 0           | -1.631210               | 0.831704  | -1.250509 |
| 6             | 1             | 0           | 0.077714                | 1.580729  | 1.171053  |
| 7             | 1             | 0           | 0.334046                | 2.031244  | -0.515836 |

|    |   |   |           |           |           |
|----|---|---|-----------|-----------|-----------|
| 8  | 1 | 0 | -1.953988 | -1.420923 | -0.535309 |
| 9  | 1 | 0 | -1.633027 | -1.029615 | 1.166764  |
| 10 | 6 | 0 | 0.903845  | 0.001550  | -0.006741 |
| 11 | 8 | 0 | 2.126108  | -0.012129 | -0.040239 |
| 12 | 7 | 0 | 0.086930  | -1.097447 | -0.073737 |
| 13 | 1 | 0 | 0.485950  | -2.025006 | -0.032466 |

---

|                                              |                             |
|----------------------------------------------|-----------------------------|
| Zero-point correction=                       | 0.110889 (Hartree/Particle) |
| Thermal correction to Energy=                | 0.116313                    |
| Thermal correction to Enthalpy=              | 0.117257                    |
| Thermal correction to Gibbs Free Energy=     | 0.082053                    |
| Sum of electronic and zero-point Energies=   | -286.544876                 |
| Sum of electronic and thermal Energies=      | -286.539453                 |
| Sum of electronic and thermal Enthalpies=    | -286.538509                 |
| Sum of electronic and thermal Free Energies= | -286.573713                 |

No imaginary vibrational frequency

### Ion b

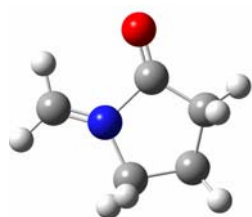

---

| Center Number | Atomic Number | Atomic Type | Coordinates (Angstroms) |           |           |
|---------------|---------------|-------------|-------------------------|-----------|-----------|
|               |               |             | X                       | Y         | Z         |
| 1             | 6             | 0           | 1.768112                | -0.238074 | -0.277313 |
| 2             | 6             | 0           | 1.127337                | 1.102244  | 0.128405  |
| 3             | 6             | 0           | 0.767818                | -1.315913 | 0.185060  |
| 4             | 1             | 0           | 1.896801                | -0.285329 | -1.362386 |
| 5             | 1             | 0           | 2.744812                | -0.389042 | 0.183796  |
| 6             | 1             | 0           | 1.418288                | 1.956118  | -0.487935 |
| 7             | 1             | 0           | 1.350746                | 1.366105  | 1.172333  |
| 8             | 1             | 0           | 0.894451                | -1.561281 | 1.245129  |
| 9             | 1             | 0           | 0.789649                | -2.234668 | -0.403147 |
| 10            | 6             | 0           | -1.711328               | -1.164606 | -0.079153 |
| 11            | 1             | 0           | -1.843855               | -2.244088 | -0.084488 |
| 12            | 1             | 0           | -2.560561               | -0.487829 | -0.177169 |
| 13            | 7             | 0           | -0.548867               | -0.648763 | 0.042410  |
| 14            | 6             | 0           | -0.354419               | 0.890785  | 0.033590  |
| 15            | 8             | 0           | -1.304173               | 1.596842  | -0.040818 |



---

|                                              |                             |
|----------------------------------------------|-----------------------------|
| Zero-point correction=                       | 0.127507 (Hartree/Particle) |
| Thermal correction to Energy=                | 0.133907                    |
| Thermal correction to Enthalpy=              | 0.134852                    |
| Thermal correction to Gibbs Free Energy=     | 0.097246                    |
| Sum of electronic and zero-point Energies=   | -324.947434                 |
| Sum of electronic and thermal Energies=      | -324.941034                 |
| Sum of electronic and thermal Enthalpies=    | -324.940090                 |
| Sum of electronic and thermal Free Energies= | -324.977695                 |

No imaginary vibrational frequency

### Benzene

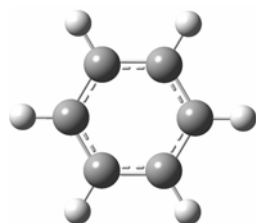

---

| Center Number | Atomic Number | Atomic Type | Coordinates (Angstroms) |           |           |
|---------------|---------------|-------------|-------------------------|-----------|-----------|
|               |               |             | X                       | Y         | Z         |
| 1             | 6             | 0           | 1.276046                | 0.572296  | -0.000011 |
| 2             | 6             | 0           | 0.142356                | 1.391116  | 0.000015  |
| 3             | 6             | 0           | -1.133666               | 0.818885  | -0.000015 |
| 4             | 6             | 0           | -1.276041               | -0.572308 | 0.000011  |
| 5             | 6             | 0           | -0.142369               | -1.391115 | -0.000006 |
| 6             | 6             | 0           | 1.133674                | -0.818875 | 0.000006  |
| 7             | 1             | 0           | 2.267304                | 1.016993  | 0.000008  |
| 8             | 1             | 0           | 0.253007                | 2.471912  | -0.000012 |
| 9             | 1             | 0           | -2.014290               | 1.455153  | 0.000012  |
| 10            | 1             | 0           | -2.267314               | -1.016971 | -0.000008 |
| 11            | 1             | 0           | -0.252983               | -2.471914 | 0.000004  |
| 12            | 1             | 0           | 2.014276                | -1.455172 | -0.000003 |

---

|                                              |                             |
|----------------------------------------------|-----------------------------|
| Zero-point correction=                       | 0.100404 (Hartree/Particle) |
| Thermal correction to Energy=                | 0.104807                    |
| Thermal correction to Enthalpy=              | 0.105751                    |
| Thermal correction to Gibbs Free Energy=     | 0.072931                    |
| Sum of electronic and zero-point Energies=   | -232.168035                 |
| Sum of electronic and thermal Energies=      | -232.163632                 |
| Sum of electronic and thermal Enthalpies=    | -232.162688                 |
| Sum of electronic and thermal Free Energies= | -232.195508                 |

No imaginary vibrational frequency

mOH-TS-2

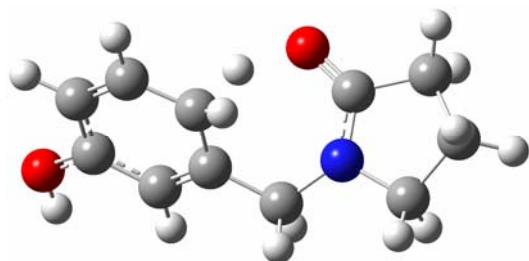

---

| Center<br>Number | Atomic<br>Number | Atomic<br>Type | Coordinates (Angstroms) |           |           |
|------------------|------------------|----------------|-------------------------|-----------|-----------|
|                  |                  |                | X                       | Y         | Z         |
| 1                | 6                | 0              | 4.043733                | -0.132726 | 0.289920  |
| 2                | 6                | 0              | 3.400564                | 0.831732  | -0.721770 |
| 3                | 6                | 0              | 2.974215                | -1.221325 | 0.488037  |
| 4                | 1                | 0              | 4.990315                | -0.550811 | -0.056157 |
| 5                | 1                | 0              | 4.230223                | 0.382896  | 1.236367  |
| 6                | 1                | 0              | 3.649857                | 0.576854  | -1.760128 |
| 7                | 1                | 0              | 3.654167                | 1.884077  | -0.578678 |
| 8                | 1                | 0              | 2.937650                | -1.609596 | 1.509776  |
| 9                | 1                | 0              | 3.108377                | -2.068379 | -0.197992 |
| 10               | 6                | 0              | 0.465386                | -1.293648 | 0.301304  |
| 11               | 1                | 0              | 0.426941                | -2.055406 | -0.488850 |
| 12               | 1                | 0              | 0.529180                | -1.838229 | 1.253676  |
| 13               | 6                | 0              | -0.829376               | -0.511108 | 0.314186  |
| 14               | 6                | 0              | -1.968300               | -1.055824 | -0.229855 |
| 15               | 6                | 0              | -0.845002               | 0.850611  | 0.817762  |
| 16               | 6                | 0              | -3.181618               | -0.320641 | -0.211252 |
| 17               | 1                | 0              | -1.952068               | -2.042989 | -0.685706 |
| 18               | 6                | 0              | -2.115881               | 1.542898  | 0.855876  |
| 19               | 1                | 0              | -0.162251               | 1.063981  | 1.646585  |
| 20               | 6                | 0              | -3.250349               | 0.988800  | 0.327732  |
| 21               | 1                | 0              | -2.148628               | 2.539935  | 1.284983  |
| 22               | 1                | 0              | -4.201785               | 1.508282  | 0.314019  |
| 23               | 7                | 0              | 1.706182                | -0.526218 | 0.165849  |
| 24               | 6                | 0              | 1.915032                | 0.613389  | -0.547325 |
| 25               | 8                | 0              | 1.025656                | 1.373801  | -0.987050 |
| 26               | 1                | 0              | -0.158772               | 1.307873  | -0.080946 |
| 27               | 8                | 0              | -4.310897               | -0.806606 | -0.712895 |
| 28               | 1                | 0              | -4.214966               | -1.705463 | -1.066010 |

---

|                                              |                             |
|----------------------------------------------|-----------------------------|
| Zero-point correction=                       | 0.232838 (Hartree/Particle) |
| Thermal correction to Energy=                | 0.244576                    |
| Thermal correction to Enthalpy=              | 0.245520                    |
| Thermal correction to Gibbs Free Energy=     | 0.194440                    |
| Sum of electronic and zero-point Energies=   | -632.362104                 |
| Sum of electronic and thermal Energies=      | -632.350366                 |
| Sum of electronic and thermal Enthalpies=    | -632.349422                 |
| Sum of electronic and thermal Free Energies= | -632.400502                 |

One imaginary vibrational frequency, -394.257

### mOH-MH-1

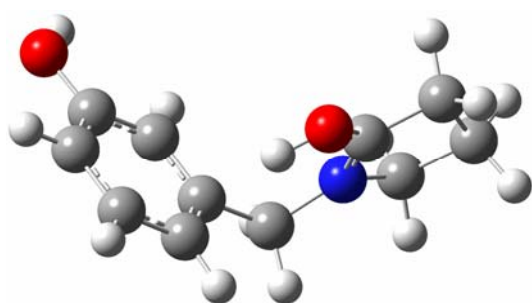

---

| Center<br>Number | Atomic<br>Number | Atomic<br>Type | Coordinates (Angstroms) |           |           |
|------------------|------------------|----------------|-------------------------|-----------|-----------|
|                  |                  |                | X                       | Y         | Z         |
| 1                | 6                | 0              | -3.946451               | 0.403687  | -0.167900 |
| 2                | 6                | 0              | -3.087879               | -0.147324 | -1.326073 |
| 3                | 6                | 0              | -2.916457               | 0.868690  | 0.880469  |
| 4                | 1                | 0              | -4.602642               | 1.216767  | -0.480279 |
| 5                | 1                | 0              | -4.571326               | -0.391146 | 0.246969  |
| 6                | 1                | 0              | -2.912998               | 0.585939  | -2.124299 |
| 7                | 1                | 0              | -3.486652               | -1.047514 | -1.800428 |
| 8                | 1                | 0              | -3.197554               | 0.624055  | 1.907581  |
| 9                | 1                | 0              | -2.695169               | 1.940185  | 0.825543  |
| 10               | 6                | 0              | -0.540839               | 0.088401  | 1.484457  |
| 11               | 1                | 0              | -0.574868               | 1.048726  | 2.006150  |
| 12               | 1                | 0              | -0.760604               | -0.693994 | 2.218736  |
| 13               | 6                | 0              | 0.819400                | -0.125565 | 0.854481  |
| 14               | 6                | 0              | 1.512597                | 0.961394  | 0.299791  |
| 15               | 6                | 0              | 1.388008                | -1.408962 | 0.824554  |
| 16               | 6                | 0              | 2.770121                | 0.763889  | -0.285664 |
| 17               | 1                | 0              | 1.083818                | 1.960698  | 0.336814  |
| 18               | 6                | 0              | 2.645444                | -1.595152 | 0.227815  |
| 19               | 1                | 0              | 0.882252                | -2.246264 | 1.298488  |
| 20               | 6                | 0              | 3.332649                | -0.523269 | -0.327275 |

|    |   |   |           |           |           |
|----|---|---|-----------|-----------|-----------|
| 21 | 1 | 0 | 3.092075  | -2.584055 | 0.212511  |
| 22 | 1 | 0 | 4.308308  | -0.651763 | -0.783244 |
| 23 | 7 | 0 | -1.678535 | 0.119856  | 0.522771  |
| 24 | 6 | 0 | -1.777290 | -0.433679 | -0.662947 |
| 25 | 8 | 0 | -0.880268 | -1.152120 | -1.273436 |
| 26 | 1 | 0 | -0.038687 | -1.239961 | -0.762065 |
| 27 | 8 | 0 | 3.500251  | 1.764894  | -0.831615 |
| 28 | 1 | 0 | 3.068105  | 2.624495  | -0.731713 |

---

|                                              |                             |
|----------------------------------------------|-----------------------------|
| Zero-point correction=                       | 0.237563 (Hartree/Particle) |
| Thermal correction to Energy=                | 0.249952                    |
| Thermal correction to Enthalpy=              | 0.250897                    |
| Thermal correction to Gibbs Free Energy=     | 0.197966                    |
| Sum of electronic and zero-point Energies=   | -632.386613                 |
| Sum of electronic and thermal Energies=      | -632.374223                 |
| Sum of electronic and thermal Enthalpies=    | -632.373279                 |
| Sum of electronic and thermal Free Energies= | -632.426210                 |

No imaginary vibrational frequency

mOH-MH-2

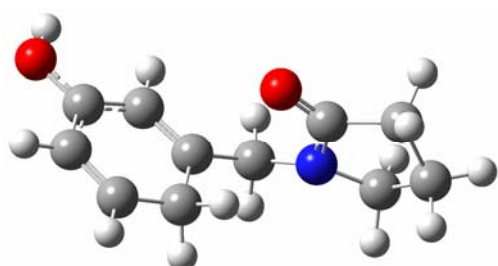

---

| Center Number | Atomic Number | Atomic Type | Coordinates (Angstroms) |           |           |
|---------------|---------------|-------------|-------------------------|-----------|-----------|
|               |               |             | X                       | Y         | Z         |
| 1             | 6             | 0           | -3.968856               | 0.304323  | -0.081007 |
| 2             | 6             | 0           | -3.195870               | 0.364002  | 1.251502  |
| 3             | 6             | 0           | -3.079485               | -0.564937 | -0.996890 |
| 4             | 1             | 0           | -4.972378               | -0.111736 | 0.022704  |
| 5             | 1             | 0           | -4.065355               | 1.307462  | -0.506759 |
| 6             | 1             | 0           | -3.499264               | -0.429033 | 1.946583  |
| 7             | 1             | 0           | -3.283380               | 1.311653  | 1.787369  |
| 8             | 1             | 0           | -3.129968               | -0.268718 | -2.048464 |
| 9             | 1             | 0           | -3.334528               | -1.631790 | -0.926112 |
| 10            | 6             | 0           | -0.548064               | -0.987932 | -0.965518 |
| 11            | 1             | 0           | -0.510677               | -2.038169 | -0.643735 |
| 12            | 1             | 0           | -0.606564               | -0.988041 | -2.062351 |

|    |   |   |           |           |           |
|----|---|---|-----------|-----------|-----------|
| 13 | 6 | 0 | 0.735006  | -0.295907 | -0.567224 |
| 14 | 6 | 0 | 1.799999  | -1.026323 | -0.105205 |
| 15 | 6 | 0 | 0.894732  | 1.161614  | -0.847017 |
| 16 | 6 | 0 | 3.025355  | -0.386446 | 0.198144  |
| 17 | 1 | 0 | 1.698959  | -2.091720 | 0.084380  |
| 18 | 6 | 0 | 2.206943  | 1.757307  | -0.489251 |
| 19 | 1 | 0 | 0.708566  | 1.340736  | -1.921109 |
| 20 | 6 | 0 | 3.225817  | 1.019654  | 0.008522  |
| 21 | 1 | 0 | 2.330789  | 2.825206  | -0.645359 |
| 22 | 1 | 0 | 4.187358  | 1.443708  | 0.275233  |
| 23 | 7 | 0 | -1.733901 | -0.324620 | -0.451343 |
| 24 | 6 | 0 | -1.756137 | 0.092228  | 0.857514  |
| 25 | 8 | 0 | -0.737158 | 0.198687  | 1.538606  |
| 26 | 1 | 0 | 0.094876  | 1.725470  | -0.348116 |
| 27 | 8 | 0 | 4.061324  | -1.043339 | 0.680314  |
| 28 | 1 | 0 | 3.888884  | -1.990969 | 0.812366  |

---

|                                              |                             |
|----------------------------------------------|-----------------------------|
| Zero-point correction=                       | 0.235946 (Hartree/Particle) |
| Thermal correction to Energy=                | 0.248584                    |
| Thermal correction to Enthalpy=              | 0.249528                    |
| Thermal correction to Gibbs Free Energy=     | 0.196191                    |
| Sum of electronic and zero-point Energies=   | -632.364005                 |
| Sum of electronic and thermal Energies=      | -632.351368                 |
| Sum of electronic and thermal Enthalpies=    | -632.350423                 |
| Sum of electronic and thermal Free Energies= | -632.403761                 |

No imaginary vibrational frequency

### mOH-TS-3

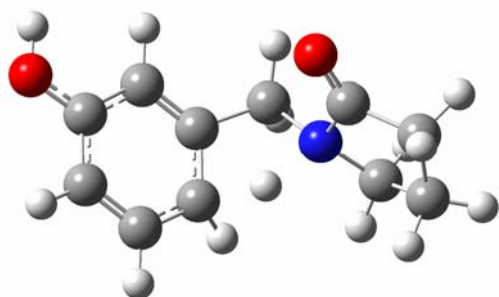

---

| Center Number | Atomic Number | Atomic Type | Coordinates (Angstroms) |           |           |
|---------------|---------------|-------------|-------------------------|-----------|-----------|
|               |               |             | X                       | Y         | Z         |
| 1             | 6             | 0           | 3.545360                | 0.774193  | -0.469277 |
| 2             | 6             | 0           | 3.256457                | -0.642112 | -0.997896 |
| 3             | 6             | 0           | 2.675643                | 0.880749  | 0.795371  |

|    |   |   |           |           |           |
|----|---|---|-----------|-----------|-----------|
| 4  | 1 | 0 | 4.600154  | 0.940800  | -0.245020 |
| 5  | 1 | 0 | 3.237668  | 1.528190  | -1.200554 |
| 6  | 1 | 0 | 3.957403  | -1.386046 | -0.598088 |
| 7  | 1 | 0 | 3.277464  | -0.740563 | -2.086111 |
| 8  | 1 | 0 | 2.390246  | 1.904730  | 1.050137  |
| 9  | 1 | 0 | 3.161752  | 0.426438  | 1.666449  |
| 10 | 6 | 0 | 0.459119  | -0.288707 | 1.485564  |
| 11 | 1 | 0 | 0.496002  | -1.362619 | 1.677942  |
| 12 | 1 | 0 | 0.700465  | 0.258020  | 2.401879  |
| 13 | 6 | 0 | -0.867615 | 0.148212  | 0.888248  |
| 14 | 6 | 0 | -1.971732 | -0.658676 | 0.768628  |
| 15 | 6 | 0 | -0.746189 | 1.368125  | 0.134399  |
| 16 | 6 | 0 | -3.023974 | -0.258360 | -0.093938 |
| 17 | 1 | 0 | -2.009784 | -1.629804 | 1.255255  |
| 18 | 6 | 0 | -1.818888 | 1.726527  | -0.740653 |
| 19 | 1 | 0 | -0.210119 | 2.209262  | 0.587885  |
| 20 | 6 | 0 | -2.926707 | 0.919231  | -0.870583 |
| 21 | 1 | 0 | -1.777394 | 2.670701  | -1.275351 |
| 22 | 1 | 0 | -3.746486 | 1.170609  | -1.534161 |
| 23 | 7 | 0 | 1.466072  | 0.086554  | 0.437022  |
| 24 | 6 | 0 | 1.886481  | -0.992120 | -0.461417 |
| 25 | 8 | 0 | 1.186372  | -1.949799 | -0.664892 |
| 26 | 1 | 0 | 0.491970  | 0.859168  | -0.230867 |
| 27 | 8 | 0 | -4.123308 | -0.992540 | -0.267554 |
| 28 | 1 | 0 | -4.144082 | -1.778417 | 0.300338  |

---

Zero-point correction= 0.231642 (Hartree/Particle)  
Thermal correction to Energy= 0.243527  
Thermal correction to Enthalpy= 0.244472  
Thermal correction to Gibbs Free Energy= 0.193084  
Sum of electronic and zero-point Energies= -632.331110  
Sum of electronic and thermal Energies= -632.319224  
Sum of electronic and thermal Enthalpies= -632.318280  
Sum of electronic and thermal Free Energies= -632.369668  
**One imaginary vibrational frequency, -1481.98**

mOH-MH-3

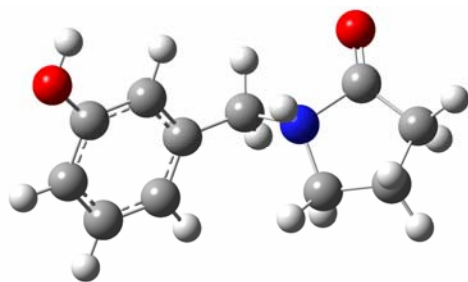

---

| Center<br>Number | Atomic<br>Number | Atomic<br>Type | Coordinates (Angstroms) |           |           |
|------------------|------------------|----------------|-------------------------|-----------|-----------|
|                  |                  |                | X                       | Y         | Z         |
| 1                | 6                | 0              | -3.135199               | 1.137109  | 1.178873  |
| 2                | 6                | 0              | -3.875866               | 0.068424  | 0.359352  |
| 3                | 6                | 0              | -1.782049               | 1.288624  | 0.469885  |
| 4                | 1                | 0              | -3.669297               | 2.088148  | 1.210446  |
| 5                | 1                | 0              | -2.994591               | 0.803924  | 2.212529  |
| 6                | 1                | 0              | -4.401968               | 0.500975  | -0.503471 |
| 7                | 1                | 0              | -4.610295               | -0.521019 | 0.914614  |
| 8                | 1                | 0              | -0.985292               | 1.706242  | 1.084696  |
| 9                | 1                | 0              | -1.869578               | 1.875810  | -0.448007 |
| 10               | 6                | 0              | -0.434586               | -0.286608 | -1.103429 |
| 11               | 1                | 0              | -0.531830               | -1.331073 | -1.407743 |
| 12               | 1                | 0              | -0.801209               | 0.354221  | -1.908211 |
| 13               | 6                | 0              | 0.963791                | 0.062829  | -0.673797 |
| 14               | 6                | 0              | 1.750473                | -0.915425 | -0.040972 |
| 15               | 6                | 0              | 1.473583                | 1.348953  | -0.880265 |
| 16               | 6                | 0              | 3.043157                | -0.597015 | 0.392971  |
| 17               | 1                | 0              | 1.375199                | -1.930639 | 0.080316  |
| 18               | 6                | 0              | 2.767389                | 1.656131  | -0.441308 |
| 19               | 1                | 0              | 0.883734                | 2.099831  | -1.398280 |
| 20               | 6                | 0              | 3.547843                | 0.697983  | 0.196232  |
| 21               | 1                | 0              | 3.171892                | 2.649171  | -0.608582 |
| 22               | 1                | 0              | 4.554652                | 0.921602  | 0.532082  |
| 23               | 7                | 0              | -1.424241               | -0.117898 | 0.056028  |
| 24               | 6                | 0              | -2.810964               | -0.842391 | -0.185629 |
| 25               | 8                | 0              | -2.824216               | -1.903441 | -0.712937 |
| 26               | 1                | 0              | -1.001424               | -0.596160 | 0.862394  |
| 27               | 8                | 0              | 3.865695                | -1.488612 | 1.001674  |
| 28               | 1                | 0              | 3.472419                | -2.371010 | 1.043652  |

---

Zero-point correction= 0.237328 (Hartree/Particle)  
Thermal correction to Energy= 0.249887  
Thermal correction to Enthalpy= 0.250832  
Thermal correction to Gibbs Free Energy= 0.197101

Sum of electronic and zero-point Energies= -632.364828  
Sum of electronic and thermal Energies= -632.352268  
Sum of electronic and thermal Enthalpies= -632.351324  
Sum of electronic and thermal Free Energies= -632.405055

No imaginary vibrational frequency

### mOH-TS-4

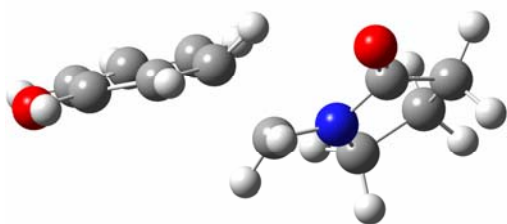

| Center Number | Atomic Number | Atomic Type | Coordinates (Angstroms) |           |           |
|---------------|---------------|-------------|-------------------------|-----------|-----------|
|               |               |             | X                       | Y         | Z         |
| 1             | 6             | 0           | -3.536397               | 1.187357  | 0.069382  |
| 2             | 6             | 0           | -3.772325               | -0.280755 | -0.341256 |
| 3             | 6             | 0           | -2.262842               | 1.161917  | 0.950285  |
| 4             | 1             | 0           | -3.362912               | 1.801616  | -0.819208 |
| 5             | 1             | 0           | -4.382229               | 1.619168  | 0.606324  |
| 6             | 1             | 0           | -4.182320               | -0.408521 | -1.344751 |
| 7             | 1             | 0           | -4.441936               | -0.804054 | 0.353063  |
| 8             | 1             | 0           | -2.494667               | 1.141580  | 2.021325  |
| 9             | 1             | 0           | -1.600895               | 2.015318  | 0.765146  |
| 10            | 6             | 0           | -0.320404               | -0.486679 | 0.908665  |
| 11            | 1             | 0           | 0.116174                | 0.109403  | 1.705797  |
| 12            | 1             | 0           | -0.255033               | -1.559821 | 1.076916  |
| 13            | 6             | 0           | 0.820756                | -0.347498 | -0.476613 |
| 14            | 6             | 0           | 0.892439                | 1.054474  | -0.807610 |
| 15            | 6             | 0           | 2.045847                | -1.006670 | -0.075351 |
| 16            | 6             | 0           | 2.068307                | 1.762644  | -0.628633 |
| 17            | 1             | 0           | -0.000069               | 1.554620  | -1.170048 |
| 18            | 6             | 0           | 3.213618                | -0.286659 | 0.102691  |
| 19            | 1             | 0           | 2.022015                | -2.077937 | 0.111479  |
| 20            | 6             | 0           | 3.214226                | 1.104412  | -0.168485 |
| 21            | 1             | 0           | 2.115089                | 2.824243  | -0.846878 |
| 22            | 1             | 0           | 4.141063                | 1.649686  | -0.014319 |
| 23            | 7             | 0           | -1.605087               | -0.097851 | 0.568245  |
| 24            | 6             | 0           | -2.407074               | -0.924775 | -0.235730 |
| 25            | 8             | 0           | -1.981684               | -1.956999 | -0.721741 |
| 26            | 1             | 0           | 0.190719                | -0.957951 | -1.137019 |



|    |   |   |          |           |          |
|----|---|---|----------|-----------|----------|
| 27 | 8 | 0 | 4.392453 | -0.804108 | 0.506336 |
| 28 | 1 | 0 | 4.347557 | -1.760144 | 0.653616 |

---

|                                              |                             |
|----------------------------------------------|-----------------------------|
| Zero-point correction=                       | 0.234598 (Hartree/Particle) |
| Thermal correction to Energy=                | 0.246911                    |
| Thermal correction to Enthalpy=              | 0.247855                    |
| Thermal correction to Gibbs Free Energy=     | 0.195424                    |
| Sum of electronic and zero-point Energies=   | -632.335061                 |
| Sum of electronic and thermal Energies=      | -632.322748                 |
| Sum of electronic and thermal Enthalpies=    | -632.321804                 |
| Sum of electronic and thermal Free Energies= | -632.374235                 |

One imaginary vibrational frequency, -90.7612

### mOH-MH-4

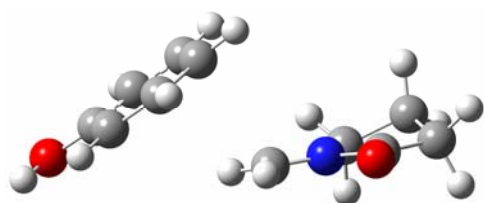

---

| Center Number | Atomic Number | Atomic Type | Coordinates (Angstroms) |           |           |
|---------------|---------------|-------------|-------------------------|-----------|-----------|
|               |               |             | X                       | Y         | Z         |
| 1             | 6             | 0           | -3.370065               | -1.457153 | 0.363392  |
| 2             | 6             | 0           | -4.004146               | -0.098315 | 0.013945  |
| 3             | 6             | 0           | -2.044379               | -1.489222 | -0.424524 |
| 4             | 1             | 0           | -3.169613               | -1.515256 | 1.437132  |
| 5             | 1             | 0           | -4.008405               | -2.300099 | 0.095994  |
| 6             | 1             | 0           | -4.649698               | 0.320209  | 0.788893  |
| 7             | 1             | 0           | -4.596679               | -0.146856 | -0.910439 |
| 8             | 1             | 0           | -2.179204               | -1.872765 | -1.441215 |
| 9             | 1             | 0           | -1.247321               | -2.050913 | 0.065874  |
| 10            | 6             | 0           | -0.495492               | 0.436381  | -0.777018 |
| 11            | 1             | 0           | 0.334905                | -0.208788 | -1.038851 |
| 12            | 1             | 0           | -0.419279               | 1.517430  | -0.839738 |
| 13            | 6             | 0           | 1.993456                | 1.528764  | 0.678808  |
| 14            | 6             | 0           | 1.230940                | 0.596527  | 1.404313  |
| 15            | 6             | 0           | 3.000692                | 1.102628  | -0.183260 |
| 16            | 6             | 0           | 1.538922                | -0.775027 | 1.295609  |
| 17            | 1             | 0           | 0.489477                | 0.938282  | 2.119755  |
| 18            | 6             | 0           | 3.280705                | -0.271212 | -0.303231 |
| 19            | 1             | 0           | 3.588426                | 1.827972  | -0.740115 |
| 20            | 6             | 0           | 2.545065                | -1.212140 | 0.440900  |

|    |   |   |           |           |           |
|----|---|---|-----------|-----------|-----------|
| 21 | 1 | 0 | 1.003945  | -1.499851 | 1.903038  |
| 22 | 1 | 0 | 2.804024  | -2.262278 | 0.356487  |
| 23 | 7 | 0 | -1.662343 | -0.060778 | -0.520408 |
| 24 | 6 | 0 | -2.843537 | 0.823285  | -0.244446 |
| 25 | 8 | 0 | -2.731620 | 2.011935  | -0.262996 |
| 26 | 1 | 0 | 1.802083  | 2.591910  | 0.792090  |
| 27 | 8 | 0 | 4.248781  | -0.758432 | -1.111807 |
| 28 | 1 | 0 | 4.753498  | -0.048661 | -1.534541 |

---

|                                              |                             |
|----------------------------------------------|-----------------------------|
| Zero-point correction=                       | 0.233535 (Hartree/Particle) |
| Thermal correction to Energy=                | 0.247267                    |
| Thermal correction to Enthalpy=              | 0.248211                    |
| Thermal correction to Gibbs Free Energy=     | 0.189848                    |
| Sum of electronic and zero-point Energies=   | -632.352576                 |
| Sum of electronic and thermal Energies=      | -632.338844                 |
| Sum of electronic and thermal Enthalpies=    | -632.337900                 |
| Sum of electronic and thermal Free Energies= | -632.396263                 |

No imaginary vibrational frequency
